## 1 **Inhibited KdpFABC resides in an E1 off-cycle state**

2 Jakob M. Silberberg\*<sup>1</sup>, Charlott Stock\*<sup>1,2</sup>, Lisa Hielkema\*<sup>3</sup>, Robin A. Corey<sup>4</sup>, Jan  
3 Rheinberger<sup>3</sup>, Dorith Wunnicke<sup>1</sup>, Victor R. A. Dubach<sup>3</sup>, Phillip J. Stansfeld<sup>5</sup>, Inga Hänel<sup>1‡</sup>,  
4 Cristina Paulino<sup>3‡</sup>

5 \*Shared equal contributions

6 ‡ Corresponding author

7 <sup>1</sup>Institute of Biochemistry, Biocenter, Goethe University Frankfurt, Max-von-Laue-Straße 9, 60438,  
8 Frankfurt/Main, Germany

9 <sup>2</sup>Current address: DANDRITE, Nordic EMBL Partnership for Molecular Medicine, Department of Molecular  
10 Biology and Genetics, Aarhus University, Universitetsbyen 81, DK-8000 Aarhus C, Denmark

11 <sup>3</sup>Department of Structural Biology, Groningen Biomolecular Sciences and Biotechnology Institute, University  
12 of Groningen, Nijenborgh 7, 9747 AG, Groningen, The Netherlands

13 <sup>4</sup>Department of Biochemistry, University of Oxford, South Parks Road, Oxford, OX1 3QU, UK

14 <sup>5</sup>School of Life Sciences & Department of Chemistry, University of Warwick, Coventry, CV4 7AL, UK

15

## 16 **Abstract**

17 KdpFABC is a high-affinity prokaryotic K<sup>+</sup> uptake system that forms a functional chimera  
18 between a channel-like subunit (KdpA) and a P-type ATPase (KdpB). At high K<sup>+</sup> levels,  
19 KdpFABC needs to be inhibited to prevent excessive K<sup>+</sup> accumulation to the point of toxicity.  
20 This is achieved by a phosphorylation of the serine residue in the TGES<sub>162</sub> motif in the  
21 A domain of the pump subunit KdpB (KdpB<sub>S162-P</sub>). Here, we explore the structural basis of  
22 inhibition by KdpB<sub>S162</sub> phosphorylation by determining the conformational landscape of  
23 KdpFABC under inhibiting and non-inhibiting conditions. Under turnover conditions, we  
24 identified a new inhibited KdpFABC conformation that we termed E1-P tight, which is not part  
25 of the canonical Post-Albers transport cycle of P-type ATPases. It likely represents the  
26 biochemically described stalled E1-P state adopted by KdpFABC upon KdpB<sub>S162</sub>  
27 phosphorylation. The E1-P tight state exhibits a compact fold of the three cytoplasmic domains  
28 and is likely adopted when the transition from high-energy E1-P states to E2-P states is  
29 unsuccessful. This study represents a structural characterization of a biologically relevant off-  
30 cycle state in the P-type ATPase family and supports the emerging discussion of P-type ATPase  
31 regulation by such conformations.

## 32 **Introduction**

33 A steady intracellular  $K^+$  concentration is vital for bacterial cells. Various export and uptake  
34 systems jointly regulate bacterial  $K^+$  homeostasis when facing rapid changes in the  
35 environment (Diskowski et al., 2015; Stautz et al., 2021). KdpFABC is a primary active  $K^+$   
36 uptake system, which is produced when the extracellular  $K^+$  supply becomes too limited for  
37 uptake by less affine translocation systems like KtrAB, TrkAH or Kup. Due to its high affinity  
38 for  $K^+$  ( $K_M = 2 \mu M$ ) and its active transport, KdpFABC can pump  $K^+$  into the cell even at steep  
39 outward-directed gradients of up to  $10^4$ , thereby guaranteeing cell survival (Altendorf et al.,  
40 1998; Epstein et al., 1993; Rhoads and Epstein, 1977).

41 The heterotetrametric KdpFABC complex comprises four subunits, namely the channel-like  
42 KdpA, a member of the superfamily of  $K^+$  transporters (SKT) (Durell et al., 2000), the P-type  
43 ATPase KdpB (Hesse et al., 1984), the lipid-like stabilizer KdpF (Gäbel et al., 1999), and  
44 KdpC, whose function is still unknown. KdpB consists of a transmembrane domain (TMD)  
45 and the characteristic cytoplasmic nucleotide binding (N), phosphorylation (P) and actuator  
46 (A) domains. Analogous to all P-type ATPases, KdpB follows a Post-Albers reaction scheme,  
47 switching between E1 and E2 states that provide alternating access to the substrate binding site  
48 during turnover (Albers, 1967; Huang et al., 2017; Post et al., 1972; Silberberg et al., 2021;  
49 Stock et al., 2018; Sweet et al., 2021). Whilst in its outward-open E1 conformation, KdpFABC  
50 binds ATP in the N domain and takes up  $K^+$  ions via the selectivity filter in KdpA, which  
51 progress into the intersubunit tunnel connecting KdpA and KdpB. Binding of ATP causes  
52 rearrangements of the cytoplasmic domains that result in nucleotide coordination between the  
53 N and P domains in the E1·ATP conformation. The  $\gamma$ -phosphate of ATP is coordinated in close  
54 proximity to the highly conserved KdpB<sub>D307</sub> of the P domain (all residue numbers refer to  
55 *Escherichia coli* KdpFABC). Upon binding of  $K^+$  to the canonical binding site (CBS) of KdpB,  
56 KdpB<sub>D307</sub> cleaves off the ATP  $\gamma$ -phosphate *via* a nucleophilic attack, leading to the

57 autophosphorylation of KdpFABC and progression to the energetically unfavorable E1-P  
58 conformation. ATP cleavage releases the N domain from the P domain, allowing relaxing  
59 rearrangements of the cytoplasmic domains that convert KdpFABC to the inward-open E2-P  
60 state, in which  $K^+$  is released from the CBS to the cytoplasm due to conformational changes in  
61 KdpB's TMD. Finally, KdpB<sub>D307</sub> is dephosphorylated by a water molecule coordinated by  
62 KdpB<sub>E161</sub> of the TGES<sub>162</sub> loop in the A domain, recycling KdpFABC via the non-  
63 phosphorylated E2 state back to its E1 ground state (Huang et al., 2017; Pedersen et al., 2019;  
64 Stock et al., 2018; Sweet et al., 2021). Thus, the relative orientation of the three cytoplasmic  
65 domains to each other and their nucleotide state (nucleotide-free, nucleotide-bound, or  
66 phosphorylated) are crucial for the assignment of catalytic states (Bublitz et al., 2010; Dyla et  
67 al., 2020). Notably, while the general catalytic reaction and conformational arrangements of  
68 the N, P and A domains follow the conventional Post-Albers cycle observed for other P-type  
69 ATPases, the alternating access of the substrate binding site in the KdpFABC complex is  
70 inverted to accommodate KdpFABC's unique inter-subunit transport mechanism involving  
71 KdpA and KdpB (Damjanovic et al., 2013; Silberberg et al., 2021; Stock et al., 2018).

72 Being a highly efficient emergency  $K^+$  uptake system, KdpFABC needs to be tightly regulated  
73 in response to changing  $K^+$  conditions, as both too low and too high potassium concentrations  
74 would be toxic (Roe et al., 2000; Stautz et al., 2021). At low  $K^+$  conditions, transcription of the  
75 *kdpFABC* operon is activated by the  $K^+$ -sensing KdpD/KdpE two-component system (Polarek  
76 et al., 1992). Further, post-translational stimulation is conferred by cardiolipin, whose  
77 concentration increases as a medium-term response to  $K^+$  limitation (Schniederberend et al.,  
78 2010; Silberberg et al., 2021). Once  $K^+$  stress has abated ( $[K^+]_{\text{external}} > 2 \text{ mM}$ ), the membrane-  
79 embedded KdpFABC is rapidly inhibited to prevent excessive uptake of  $K^+$  (Roe et al., 2000).  
80 This is achieved by a post-translational phosphorylation of KdpB<sub>S162</sub> (yielding  
81 KdpFAB<sub>S162-P</sub>C), which is part of the highly conserved TGES<sub>162</sub> motif of the A domain (Huang

82 et al., 2017; Sweet et al., 2020). In the crystal structure of KdpFABC [5MRW], phosphorylated  
83 KdpB<sub>S162</sub> forms salt bridges with KdpB<sub>K357</sub> and KdpB<sub>R363</sub> of the N domain and adopts an  
84 unusual E1 conformation. It was suggested that the salt bridge formation inhibits KdpFABC  
85 by locking the complex in this conformation (Huang et al., 2017). However, the salt bridges  
86 were shown to be non-essential to the inhibition mechanism, leaving the role of this  
87 conformation unclear (Stock et al., 2018; Sweet et al., 2020). Recent functional studies showed  
88 that KdpB<sub>S162</sub> phosphorylation stalls the complex in an intermediate E1-P state, preventing the  
89 transition to the inward-open E2-P conformation (Sweet et al., 2020).

90 Here, we set out to address the structural basis for KdpFABC inhibition by KdpB<sub>S162</sub>  
91 phosphorylation. The conformational landscape of KdpFABC was probed under different  
92 conditions by cryo-EM, yielding 10 structures representative of 6 distinct states that describe  
93 the full conformational spectrum of the KdpFABC catalytic cycle and resolve the effect of the  
94 inhibitory phosphorylation on the conformational plasticity of the complex. Distinct  
95 conformational states were further characterized by pulsed EPR measurements and MD  
96 simulations to decipher how KdpB<sub>S162</sub> phosphorylation leads to the inhibition of the complex  
97 in the high-energy E1-P intermediate.

98

## 99 **Results**

100 Previous structural studies of KdpFABC were exclusively conducted in the presence of  
101 conformation-specific inhibitors (Huang et al., 2017; Silberberg et al., 2021; Stock et al., 2018;  
102 Sweet et al., 2021). To describe the structural effects of KdpFABC inhibition by KdpB<sub>S162</sub>  
103 phosphorylation, we prepared cryo-EM samples of KdpFABC variants under conditions aimed  
104 at covering the conformational landscape of both the non-phosphorylated, active and the  
105 phosphorylated, inhibited complex (Table 1; Table 1 – Table Supplement 1). For this, all  
106 KdpFABC variants were produced in *Escherichia coli* at high K<sup>+</sup> concentration, which is

107 known to lead to the inhibitory KdpB<sub>S162</sub> phosphorylation (Sweet et al., 2020). Then,  
 108 KdpFAB<sub>S162A</sub>C, a non-phosphorylatable KdpB<sub>S162</sub> variant, and wild type KdpFABC  
 109 (KdpFAB<sub>S162-P</sub>C) were analyzed under turnover conditions, i.e., in the presence of saturating  
 110 KCl and ATP concentrations, to gain insights into the dynamic conformational landscape  
 111 adopted by the complex. To supplement these samples, inhibited WT KdpFAB<sub>S162-P</sub>C was  
 112 prepared in the presence of orthovanadate, known to normally arrest P-type ATPases in an E2  
 113 state. Further, the catalytically inactive variant KdpFAB<sub>S162-P/D307N</sub>C was prepared under  
 114 nucleotide-free conditions to investigate E1 apo states. In sum, the 10 maps obtained from the  
 115 four samples cover the entire KdpFABC conformational cycle. All structures exhibit the same  
 116 intersubunit tunnel described previously, which varies in length depending on the state, and is  
 117 filled with densities assigned as K<sup>+</sup> ions (Silberberg et al., 2021; Stock et al., 2018). Between  
 118 structures, the ion densities vary slightly in number and position (Table 1 – Figure  
 119 Supplement 1).

120  
 121 **Table 1: Conformational landscape of KdpFABC resolved by cryo-EM. Four samples were prepared for**  
 122 **cryo-EM analysis. Structural models were built for all maps with a resolution of 4 Å or below.**

| Protein sample                   | Condition                                      | State/Resolution |             |              |                         |          |            |       |
|----------------------------------|------------------------------------------------|------------------|-------------|--------------|-------------------------|----------|------------|-------|
|                                  |                                                | E1 apo open      |             | E1 apo tight | E1·ATP <sub>early</sub> | E1-P·ADP | E1-P tight | E2-P  |
|                                  |                                                | Sub-state 1      | Sub-state 2 |              |                         |          |            |       |
| KdpFAB <sub>S162-P</sub> C       | 50 mM KCl<br>2 mM ATP<br>("turnover")          |                  |             |              | 3.5 Å                   | 3.1 Å    | 3.4 Å      |       |
|                                  | 1 mM KCl<br>2 mM VO <sub>4</sub> <sup>3-</sup> |                  |             |              |                         |          | 3.3 Å      | 7.4 Å |
| KdpFAB <sub>S162-P/D307N</sub> C | 50 mM KCl                                      | 3.5 Å            | 3.7 Å       | 3.4 Å        |                         |          |            |       |
| KdpFAB <sub>S162A</sub> C        | 50 mM KCl<br>2 mM ATP<br>("turnover")          |                  |             |              |                         | 3.7 Å    |            | 4.0 Å |

123  
 124 **Non-inhibited KdpFABC transitions through the Post-Albers cycle under turnover**  
 125 **conditions**

126 Previous functional and structural studies have shown that non-phosphorylatable  
 127 KdpFAB<sub>S162A</sub>C can adopt major states of the Post-Albers cycle (Sweet et al., 2021, 2020).  
 128 However, the different conformations were captured with the help of various state-specific

129 inhibitors, limiting our understanding of KdpFABC's full conformational landscape. To  
130 determine the predominant states under turnover conditions, non-phosphorylatable  
131 KdpFAB<sub>S162A</sub>C was incubated with 2 mM ATP and 50 mM KCl for 5 minutes at RT  
132 immediately before plunge freezing and analyzed by cryo-EM. From this dataset, we obtained  
133 'only' two structures of KdpFABC (Figure 1; Table 1; Figure 1 – Figure Supplement 1–2;  
134 Table 1 – Table Supplement 1).

135

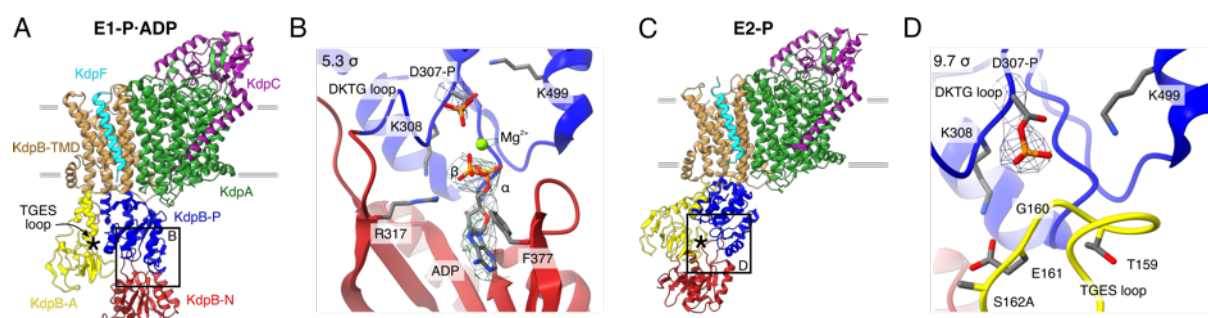

136

137 **Figure 1: Structures of KdpFAB<sub>S162A</sub>C obtained at turnover conditions.** Color code throughout the  
138 manuscript, unless stated otherwise, is as follows: KdpF in cyan, KdpA in green, KdpC in purple, KdpB TMD in  
139 sand with P domain in blue, N domain in red and A domain in yellow and position of the TGES<sub>162</sub> loop denoted  
140 by an asterisk. **A** E1-P-ADP structure, with its nucleotide binding site (**B**), showing the bound ADP with Mg<sup>2+</sup>.  
141 **C** E2-P structure, with its nucleotide binding site (**D**), showing the catalytically phosphorylated KdpB<sub>D307</sub> (P  
142 domain), and the TGES<sub>162</sub> loop (A domain) in close proximity. Densities are shown at the indicated  $\sigma$  level.

143

144 The first structure, resolved globally at 3.7 Å and derived from ~35% of the initial particle set,  
145 shows an E1 state. The overall orientation of the cytosolic domains is reminiscent of our  
146 previously published E1·ATP structure [7NNL] (Figure 1A; Figure 1 – Figure Supplement 2E)  
147 (Silberberg et al., 2021). However, closer inspection of the N domain reveals no density around  
148 the expected  $\gamma$ -phosphate of ATP, whereas additional density is observed near KdpB<sub>D307</sub>. We  
149 interpret that ADP, instead of ATP, is bound and the catalytic aspartate KdpB<sub>D307</sub> has been  
150 phosphorylated (Figure 1B). An additional density observed near the phosphorylated KdpB<sub>D307</sub>  
151 coincides with an Mg<sup>2+</sup> ion in the E1-P-ADP SERCA structure [1T5T] (Sørensen et al., 2004),  
152 and has thus likewise been assigned as a coordinating Mg<sup>2+</sup> ion (Figure 1B). Altogether, this  
153 conformation represents an E1-P-ADP state, following ATP hydrolysis but preceding the

154 release of ADP. The second structure obtained from the KdpFAB<sub>S162A</sub>C sample under turnover  
155 conditions was resolved globally at 4.0 Å from ~28% of the initial particle set. In this structure,  
156 KdpB<sub>D307</sub> is phosphorylated and the TGES<sub>162</sub> loop is in close proximity, which is the hallmark  
157 of a E2-P conformation (Figure 1C,D). This resembles the previously published E2-P structure  
158 [7BH2], which was stabilized by the phosphate analogue BeF<sub>3</sub><sup>-</sup> (Figure 1 – Figure Supplement  
159 2J) (Sweet et al., 2021). In comparison to the E1-P·ADP state, the A domain in the E2-P state  
160 has undergone a tilt of 60° and a rotation of 64° around the P domain, positioning the TGES<sub>162</sub>  
161 loop to dephosphorylate KdpB<sub>D307</sub> in the P domain, while the P domain is also tilted by 40°  
162 (Figure 1 – Figure Supplement 3).

163 The E1-P·ADP and E2-P structures obtained for KdpFAB<sub>S162A</sub>C confirm that, in the absence  
164 of the inhibitory KdpB<sub>S162</sub> phosphorylation, KdpFABC progresses through the entire Post-  
165 Albers cycle under turnover conditions, with the ADP release in the E1 conformation and the  
166 dephosphorylation of KdpB<sub>D307</sub> in the E2 conformation likely being the rate-limiting steps that  
167 lead to an accumulation of the observed states.

168

### 169 **Inhibited E1-P KdpFABC adopts an off-cycle conformation**

170 To study the structural implications of KdpFABC inhibition by KdpB<sub>S162</sub> phosphorylation, we  
171 next analyzed the conformational landscape of WT KdpFAB<sub>S162-P</sub>C under turnover conditions.  
172 To our surprise, the dataset disclosed a higher degree of conformational variability than  
173 KdpFAB<sub>S162A</sub>C, yielding three distinct cryo-EM structures (Figure 2; Table 1; Figure 2 –  
174 Figure Supplement 1–2; Table 1 – Table Supplement 1). The obtained structures show  
175 significant deviations in the cytoplasmic region of KdpB, indicative of different positions in  
176 the conformational cycle.

177 The first KdpFAB<sub>S162-P</sub>C turnover structure, resolved at an overall resolution of 3.5 Å and  
178 derived from ~9% of the initial particle set, resembles the E1·ATP structure [7NNL]

179 (Silberberg et al., 2021) (Figure 2A; Figure 2 – Figure Supplement 2E). However, a closer  
180 analysis of the cytosolic domains and the bound nucleotide reveals significant differences.  
181 While ATP is coordinated in a similar fashion as previously observed (Silberberg et al., 2021;  
182 Sweet et al., 2021), the N domain is slightly displaced relative to the P domain, providing more  
183 access to the nucleotide binding site (Figure 2A,B; Figure 2 – Figure Supplement 2E). We  
184 interpret this structure as an E1·ATP conformation at an early stage of nucleotide binding and  
185 refer to it as E1·ATP<sub>early</sub>. By contrast, inhibitors such as AMPPCP likely stabilize the latest  
186 possible and otherwise transient E1·ATP state right before hydrolysis, explaining the  
187 discrepancy between the AMPPCP-stabilized [7NNL] and the E1·ATP state obtained here  
188 under turnover conditions. The second KdpFAB<sub>S162-P</sub>C turnover structure, resolved at an  
189 overall resolution of 3.1 Å and representing ~31% of the initial particle set, is virtually identical  
190 to the above-described E1·P·ADP conformation of KdpFAB<sub>S162A</sub>C (Figure 2C,D; Figure 2 –  
191 Figure Supplement 2J).

192 While the first two structures represent known states of the catalytic cycle, the third  
193 KdpFAB<sub>S162-P</sub>C structure obtained under turnover conditions shows an unusual compact  
194 conformation of the cytosolic domains not yet observed in the Post-Albers cycle of other P-type  
195 ATPases (Figure 2E,F). The structure was resolved at an overall resolution of 3.4 Å and derived  
196 from ~14% of the initial particle set. Strikingly, the N domain is closely associated with the  
197 A domain, thereby disrupting the nucleotide binding site between the N and P domains  
198 (Figure 2E,F; Figure 2 – Figure Supplement 3). Closer inspection of the nucleotide binding site  
199 shows that the catalytic aspartate KdpB<sub>D307</sub> is phosphorylated, but not located in proximity to  
200 the TGES<sub>162</sub> loop of the A domain (Figure 2F). This indicates that the conformation is adopted  
201 after the canonical E1·P state, which in a normal non-inhibited catalytic cycle would transition  
202 into an E2·P state. Due to its compact organization, we termed this conformation E1·P tight.



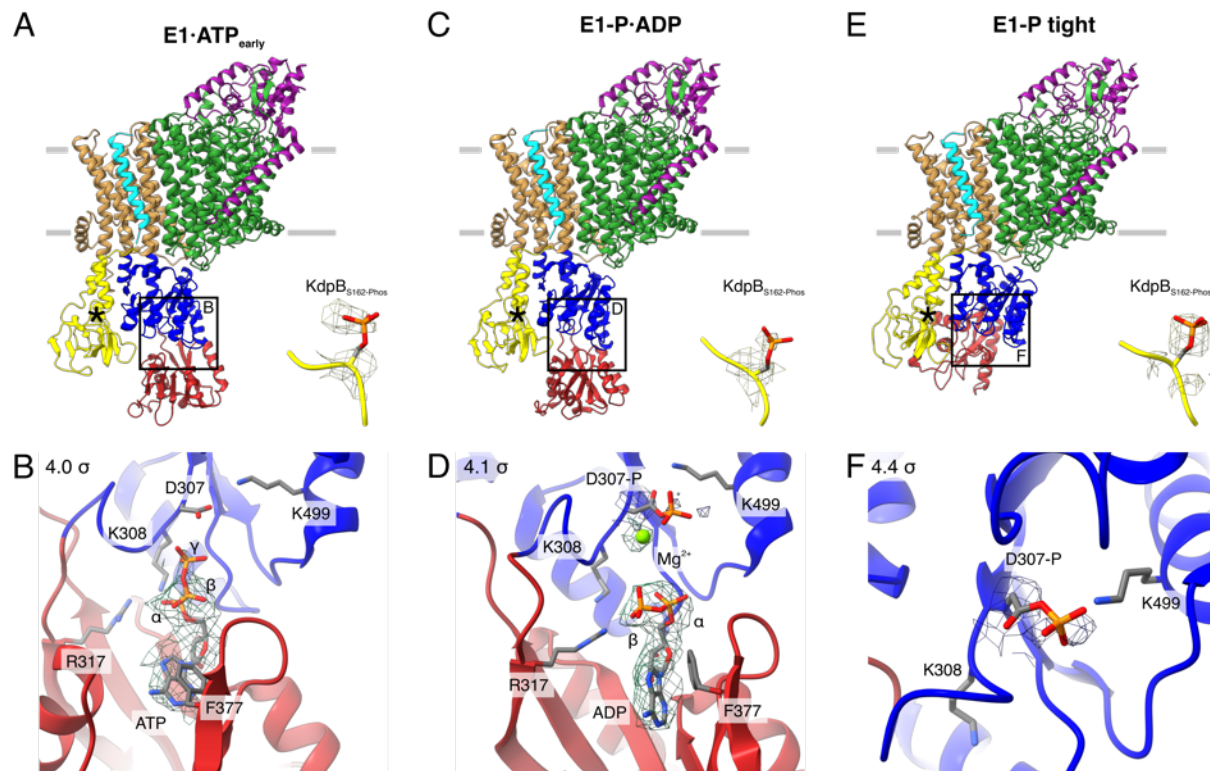

203  
204 **Figure 2: Structures of WT KdpFAB<sub>S162-P</sub>C obtained at turnover conditions.** A E1·ATP<sub>early</sub> structure with the  
205 corresponding density of KdpB<sub>S162</sub> phosphorylation and (B) its nucleotide binding site, showing the bound ATP.  
206 C E1-P·ADP structure with the corresponding density of KdpB<sub>S162</sub> phosphorylation and (D) its nucleotide binding  
207 site, showing the bound ADP with Mg<sup>2+</sup>. Densities are shown for KdpB<sub>D307-P</sub>, Mg<sup>2+</sup>, and ADP. E E1-P tight  
208 structure with the corresponding density for KdpB<sub>S162</sub> phosphorylation and (F) its nucleotide binding site.  
209 Densities are shown at the indicated σ level.

210

211 Previous biochemical studies have shown that KdpB<sub>S162</sub> phosphorylation inhibits KdpFABC  
212 by preventing the transition to an E2 state and stalling it in an E1-P state (Sweet et al., 2020).

213 In line with these observations, we could not identify any conformation following E1-P in the

214 Post-Albers cycle for KdpFAB<sub>S162-P</sub>C, despite the turnover conditions used. Based on this, we

215 hypothesized that the novel E1-P tight state observed represents a non-Post-Albers

216 conformation that is adopted because KdpFAB<sub>S162-P</sub>C cannot proceed to the E2-P state. To

217 further put this to test, we analyzed the conformations adopted by WT KdpFAB<sub>S162-P</sub>C in the

218 presence of the phosphate mimic orthovanadate, which has been shown to trap P-type ATPases

219 in an E2-P conformation and, of all E2 state inhibitors, best mimics the charge distribution of

220 a bound phosphate (Table 1; Figure 2 – Figure Supplement 4–5; Table 1 – Table Supplement 1)

221 (Clausen et al., 2016; Pedersen et al., 2019). Interestingly, KdpFAB<sub>S162-P</sub>C incubated with

222 2 mM orthovanadate prior to cryo-EM sample preparation did not conform to this behavior.  
223 Instead, the major fraction of this sample (~62% of the initial particle set) resulted in an E1-P  
224 tight conformation, resolved at 3.3 Å, which is virtually identical to the E1-P tight  
225 conformation obtained under turnover conditions (Figure 2 – Figure Supplement 3H). The  
226 position of the orthovanadate coincides with that adopted by the phosphorylated KdpB<sub>D307</sub>,  
227 verifying the assignment of this state as a phosphorylated E1-P intermediate (Figure 2 – Figure  
228 Supplement 5). Only a minor fraction of the orthovanadate-stabilized sample (~11% of the  
229 initial particle set) adopts an E2-P conformation. Despite the rather poor resolution of 7.4 Å,  
230 the conformational state could be confirmed by comparison of the cryo-EM map with the  
231 previously published E2-P structure [7BH2] (Figure 2 – Figure Supplement 4I) (Sweet et al.,  
232 2021). The minor fraction found in an E2 state likely represents the residual KdpFABC in the  
233 sample lacking KdpB<sub>S162</sub> phosphorylation, as it is in good agreement with the residual ATPase  
234 activity level (Sweet et al., 2020). The fact that, in the presence of orthovanadate,  
235 KdpFAB<sub>S162-P</sub>C adopts the E1-P tight state instead of an E2-P conformation strongly supports  
236 the idea that the inhibited complex cannot transition into an E2 state but instead adopts an off-  
237 cycle E1-P state after ADP dissociation.

238

### 239 **A tight conformation is also formed in the absence of nucleotide**

240 Interestingly, the close association of the N domain with the A domain in the E1-P tight  
241 conformation also shows some similarities to the E1 crystal structure of KdpFABC [5MRW],  
242 the first structure of KdpFABC ever solved (Huang et al., 2017). Unlike our E1-P tight state,  
243 the crystal structure is nucleotide-free and does not contain a phosphorylated KdpB<sub>D307</sub>, raising  
244 the question how it fits in the conformational landscape of KdpFABC. To further investigate  
245 the role of the tight conformation in the conformational cycle of KdpFABC, we prepared a  
246 cryo-EM sample of KdpFAB<sub>S162-P/D307N</sub>C under nucleotide-free conditions. This mutant is

247 catalytically inactive and thus restricted to E1 states preceding ATP hydrolysis. In total, we  
248 were able to obtain three distinct structures from this preparation, which we assigned to two  
249 states relevant to the transport cycle (Figure 3, Table 1; Figure 3 – Figure Supplement 1–2;  
250 Table 1 – Table Supplement 1).  
251

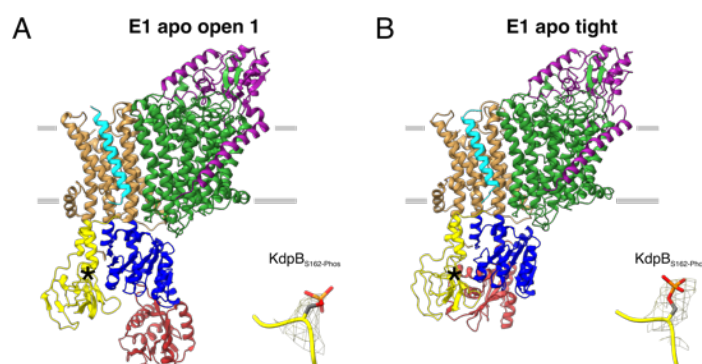

252 **Figure 3: E1 apo structures of KdpFAB<sub>S162-P/D307N</sub>C obtained at nucleotide-free conditions.** **A** E1 apo open  
253 substate 1 structure with the corresponding density of KdpB<sub>S162</sub> phosphorylation. The E1 apo open substate 2  
254 differs by a slightly displaced orientation of the N domain (see also Figure 3 – Figure Supplement 1,2). **B** E1 apo  
255 tight structure with the corresponding density of KdpB<sub>S162</sub> phosphorylation.  
256

257  
258 The first state, composed of 26% of the initial particle set from the nucleotide-free sample,  
259 corresponds to the canonical Post-Albers E1 state that precedes ATP binding and resembles  
260 the E1 apo state [7BH1] reported previously (Sweet et al., 2021) (Figure 3A; Figure 3 – Figure  
261 Supplement 2E). We have termed this conformation the E1 apo open state, as the N and P  
262 domains are far apart to provide access to the nucleotide binding site. The cytosolic domains  
263 of KdpB reveal a high conformational heterogeneity, evidenced by their lower local resolution  
264 (Figure 3 – Figure Supplement 2B,G). Focused 3D classification allowed the distinction of two  
265 substates, resolved globally at 3.5 Å and 3.7 Å, differing in the relative position of the N to the  
266 P domain (Figure 3 – Figure Supplement 2J). The high degree of flexibility of the N domain in  
267 this open conformation likely facilitates nucleotide binding at the start of the Post-Albers cycle.  
268 The second state, featuring one structure resolved globally at 3.4 Å and represented by 19% of  
269 the initial particle set, shows a compact conformation of the cytosolic domains with the N and

270 A domains in close contact, providing no space for a nucleotide to bind (Figure 3C). This state  
271 is similar, but not identical to the one observed in the E1-P tight state and [5MRW], and we  
272 have termed it the E1 apo tight state (Figure 3 – Figure Supplement 2O). The presence of a  
273 similar tight conformation in both the E1-P and the E1 apo states of KdpB<sub>S162-P</sub>, shows that,  
274 while the inhibitory KdpB<sub>S162</sub> phosphorylation appears to be a prerequisite, the observed close  
275 association of the N and A domains can occur before or after the binding and hydrolysis of  
276 ATP.

277

278 **The tight state interaction between the N and A domains is itself not the cause of**  
279 **inhibition**

280 Structures with a tight arrangement of the A and N domains were only obtained in cryo-EM  
281 samples featuring KdpB<sub>S162-P</sub>. To evaluate the dependency of a tight state formation on  
282 KdpB<sub>S162</sub> phosphorylation, we assessed the full conformational flexibility of the N domain  
283 using pulsed EPR spectroscopy. Distances between the N and P domains were measured with  
284 the labeled residues KdpB<sub>A407CR1</sub> and KdpB<sub>A494CR1</sub> (Figure 4A,B; Figure 4 – Figure  
285 Supplement 1). Variants were produced at high K<sup>+</sup> concentrations to confer KdpB<sub>S162</sub>  
286 phosphorylation. EPR analysis of KdpFAB<sub>S162-P/D307N</sub>C in the absence of nucleotide resulted in  
287 distances that resemble the E1 apo tight and the E1 apo open conformations (Figure 4B). This  
288 corroborates the cryo-EM results that both tight and open states are adopted in the same sample  
289 at nucleotide-free conditions. In contrast, the non-phosphorylatable variant KdpB<sub>S162A</sub> resulted  
290 in a distance distribution showing a near total elimination of the E1 apo tight state. This strongly  
291 indicates that the tight state is stabilized by KdpB<sub>S162</sub> phosphorylation, although it still exists  
292 to a small extent even in the absence of the inhibitory phosphorylation.

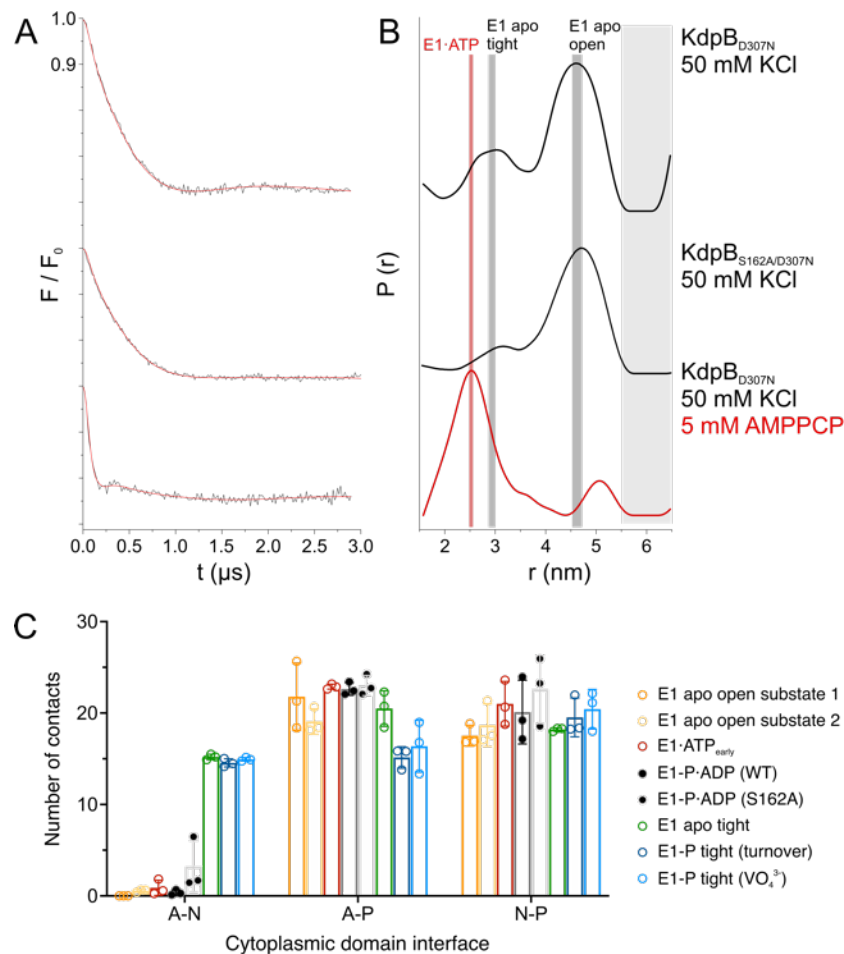

293  
 294 **Figure 4: KdpB<sub>S162-P</sub> increases interdomain contacts in E1 tight states.** **A** Background-corrected dipolar  
 295 evolution function  $F(t)$  with applied fit (red lines) of DEER measurements. **B** Area-normalized interspin distance  
 296 distribution  $P(r)$  obtained by Tikhonov regularization. Two KdpFABC variants were prepared with 50 mM KCl  
 297 and in the presence (red curve) or absence (black curves) of 5 mM AMPPCP. KdpFAB<sub>D307N</sub>C and  
 298 KdpFAB<sub>S162A/D307N</sub>C without AMPPCP show two conformations, with N-P domain distances of 3 nm and 4.5 nm  
 299 corresponding to the E1 apo tight and E1 apo open states (dominant state), respectively, as indicated by dark grey  
 300 background shading. The removal of the inhibitory phosphorylation site in KdpFAB<sub>S162A/D307N</sub>C showed a  
 301 significant decrease of the distance corresponding to the E1 apo tight state (3 nm) compared to KdpFAB<sub>D307N</sub>C.  
 302 Addition of AMPPCP to KdpFAB<sub>D307N</sub>C resulted in a single stabilized distance of 2.5 nm, representing the  
 303 E1-ATP conformation as indicated by red background shading. Light grey shaded areas starting at 5.5 nm indicate  
 304 unreliable distances. **C** Contact analysis between the N, P and A domains for all E1 structures obtained in this  
 305 study. Average of the number of contacts (>90% contact) between the different domains over 3 x 50 ns MD  
 306 simulations (see also Figure 4 – Figure Supplement 2 for details of identified high-contact  
 307 interactions). Interactions between A and P or N and P domains remain consistent across all states, while  
 308 interactions between A and N domains are increased only in E1 tight conformations.

309

310 To inspect what makes the off-cycle tight conformations energetically preferable, we  
 311 quantified the cytosolic domain interactions of all E1 states obtained in this study using contact  
 312 analysis by molecular dynamics (MD) simulation (Figure 4C; Figure 4 – Figure Supplement 2).  
 313 While no large differences are observed for the contacts between A and P or N and P domains,  
 314 the off-cycle E1 tight states (E1 apo tight, E1-P tight) are the only ones to show a higher number

315 of interactions between the A and N domains. In fact, they share a nearly identical number of  
316 contacts, indicating that the A and N domains move in a concerted manner, similar to previous  
317 observations by MD simulations (Dubey et al., 2021). The most evident interaction seen in all  
318 three tight states is formed by the salt bridges between the phosphate of KdpB<sub>S162-P</sub> in the  
319 A domain and KdpB<sub>K357/R363</sub> in the N domain, which were first described in [5MRW] (Huang  
320 et al., 2017). However, functional studies have shown that these salt bridges are not essential  
321 for the inhibition (Sweet et al., 2020), and neither are they sufficient to fully arrest a tight state,  
322 as shown here. In agreement to this, EPR measurements with KdpFAB<sub>S162-P/D307N</sub>C in the  
323 presence of the ATP analogue AMPPCP result in a distance distribution that shows a single  
324 and well-defined distance, which corresponds to the E1·ATP state. Hence, the salt bridges and  
325 the enhanced interaction platform between the A and N domain seen in the tight states likely  
326 have a stabilizing role, but can be easily broken and are themselves not the main cause of  
327 inhibition.

328

### 329 **E1-P tight is the consequence of an impaired E1-P/E2-P transition**

330 As the compact arrangement found in the E1 tight states itself is not the determining factor of  
331 inhibition, the question remains how K<sup>+</sup> transport is blocked in KdpFAB<sub>S162-P</sub>C and what role  
332 the E1-P tight state plays. In a non-inhibited transport cycle, KdpFABC rapidly relaxes from  
333 the high-energy E1-P state into the E2-P conformation. To identify what structural  
334 determinants enable the arrest before this transition, we compared the E1-P tight structure with  
335 the other structures obtained in this study (Figure 5). The E1-P tight state features a tilt of the  
336 A domain by 26° in helix 4 (KdpB<sub>198-208</sub>) that is not found in the other E1 states, including the  
337 E1 apo tight state (Figure 5B,C – arrow 1). This tilt is reminiscent of the movement the  
338 A domain undergoes during the E1-P/E2-P transition (60° tilt, Figure 1 – Figure  
339 Supplement 3), but not as far and does not feature the rotation around the P domain

340 (Figure 5 – Figure Supplement 1B,C). Moreover, the P domain does not show the tilt observed  
341 in the normal E1-P/E2-P transition. Notably, this is the movement that brings KdpB<sub>D307-P</sub> in  
342 close proximity of KdpB<sub>S162</sub> in the catalytic cycle (Figure 5 – Figure Supplement 2, Video 1).  
343 In an inhibited state, where both sidechains are phosphorylated, such a transition is most likely  
344 impaired due to the large charge repulsion. A comparison of the E1-P tight structure with the  
345 E1-P·ADP structure, its immediate precursor in the conformational cycle, moreover, reveals a  
346 number of significant rearrangements within the P domain (Figure 5B,C). First, Helix 6  
347 (KdpB<sub>538-545</sub>) is partially unwound and has moved away from helix 5 towards the A domain,  
348 alongside the tilting of helix 4 of the A domain (Figure 5B,C – arrow 2). Second, and of  
349 particular interest, are the additional local changes that occur in the immediate vicinity of the  
350 phosphorylated KdpB<sub>D307</sub>. In the high-energy E1-P·ADP structure, the catalytic aspartyl  
351 phosphate, located in the D<sub>307</sub>KTG signature motif, points towards the negatively charged  
352 KdpB<sub>D518/D522</sub>. This repulsion might serve as a driving force for the system to relax into the E2  
353 state in the catalytic cycle. By contrast, the D<sub>307</sub>KTG loop is largely uncoiled in the E1-P tight  
354 state, with the phosphorylated KdpB<sub>D307</sub> pointing in the opposite direction, releasing this  
355 electrostatic strain (Figure 5C – arrow 4). This conformation is further stabilized by a salt  
356 bridge formed with KdpB<sub>K499</sub>. The uncoiling in the E1-P tight conformation is likely mediated  
357 by the movement of the N domain towards the A domain, as the N domain is directly connected  
358 to the D<sub>307</sub>KTG loop (Figure 5C – arrow 3). Altogether, we propose that, in presence of the  
359 inhibitory KdpB<sub>S162-P</sub>, the high-energy E1-P·ADP state can no longer transition into an E2-P  
360 state after release of ADP and Mg<sup>2+</sup>. As a consequence, the conformational changes observed  
361 in the E1-P tight state likely ease the electrostatic tensions of the phosphorylated P domain and  
362 stall the system in a ‘relaxed’ off-cycle state.

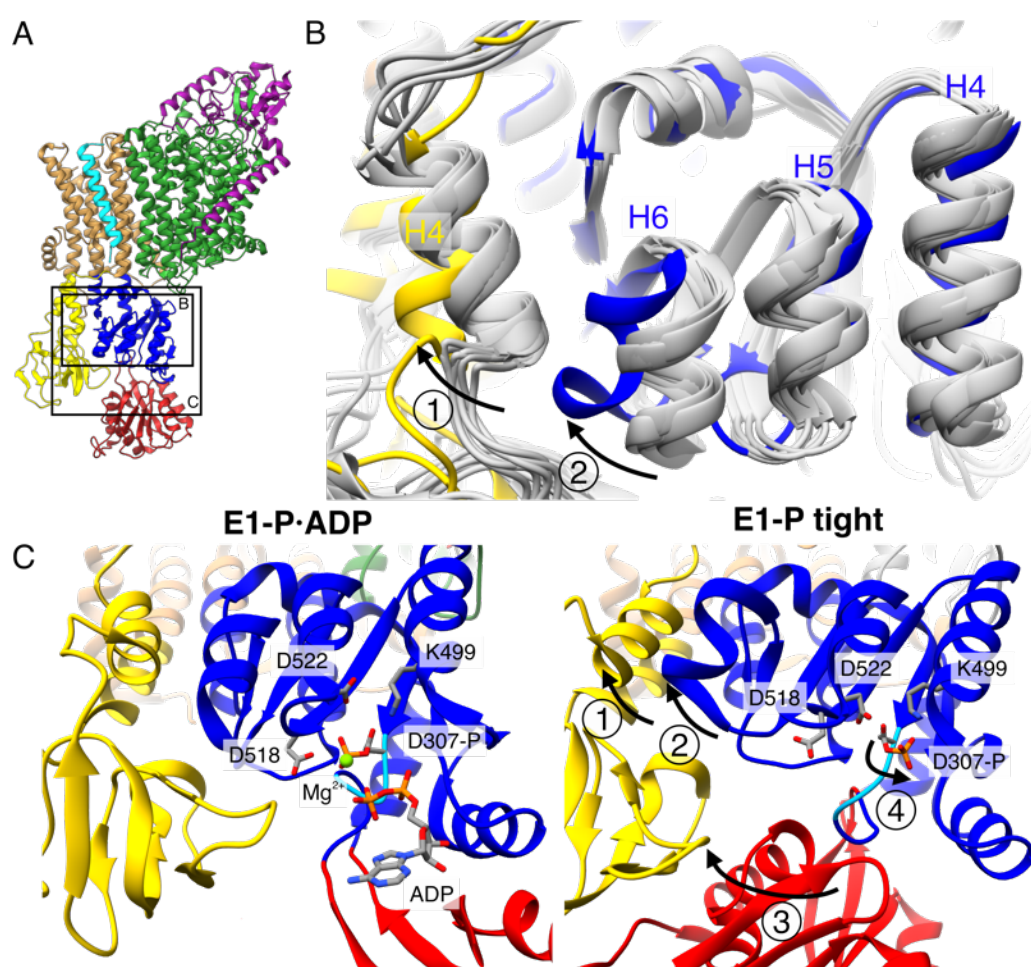

363  
 364 **Figure 5: Structural rearrangements in the E1-P tight state facilitate KdpFABS<sub>162-P-C</sub> stalling.** A Structure  
 365 of KdpFABS<sub>162-P-C</sub> in the E1-P tight state obtained at turnover conditions. B Overlay of all E1 structures  
 366 determined in this study (in gray) shows helix rearrangements particular to the E1-P tight state (in color). Arrow 1  
 367 indicates how the A domain helix 4 tilts away from the TMD by 26°; Arrow 2 indicates how P domain helix 6  
 368 moves along with A domain helix 4, slightly uncoiling and shifting away from the remaining P domain. C Vicinity  
 369 of the catalytic aspartyl phosphate (KdpB<sub>D307-P</sub>) in the KdpFABS<sub>162-P-C</sub> E1-P·ADP and E1-P tight structures,  
 370 showing rearrangements in the P domain to ease tensions of the E1-P state. In the high-energy E1-P·ADP state,  
 371 KdpB<sub>D307-P</sub> shows strong electrostatic clashes with KdpB<sub>D518/D522</sub> (2.9 and 3.5 Å, respectively). These are  
 372 alleviated by rearrangements in the E1-P tight state. Arrow 3 indicates the movement of the N domain towards  
 373 the A domain in the tight conformation, which pulls on the D<sub>307</sub>KTG loop (light blue) containing the aspartyl  
 374 phosphate to uncoil and reorient it. Arrow 4 indicates how this rearrangement reorients the phosphorylated  
 375 KdpB<sub>D307-P</sub> away from KdpB<sub>D518/D522</sub> (7.8 and 4.1 Å, respectively) to form a salt bridge with KdpB<sub>K499</sub> (3.9 Å).

376  
 377  
 378

## Discussion

379 We set out to deepen our understanding of the structural basis of KdpFABC inhibition via  
 380 KdpB<sub>S162</sub> phosphorylation by sampling the conformational landscape under various conditions  
 381 by cryo-EM. The 10 cryo-EM maps of KdpFABC, which represent six distinct states, cover  
 382 the full conformational landscape of KdpFABC and, most importantly, uncover a non-Post-  
 383 Albers regulatory off-cycle state involved in KdpFABC inhibition (Figure 6).



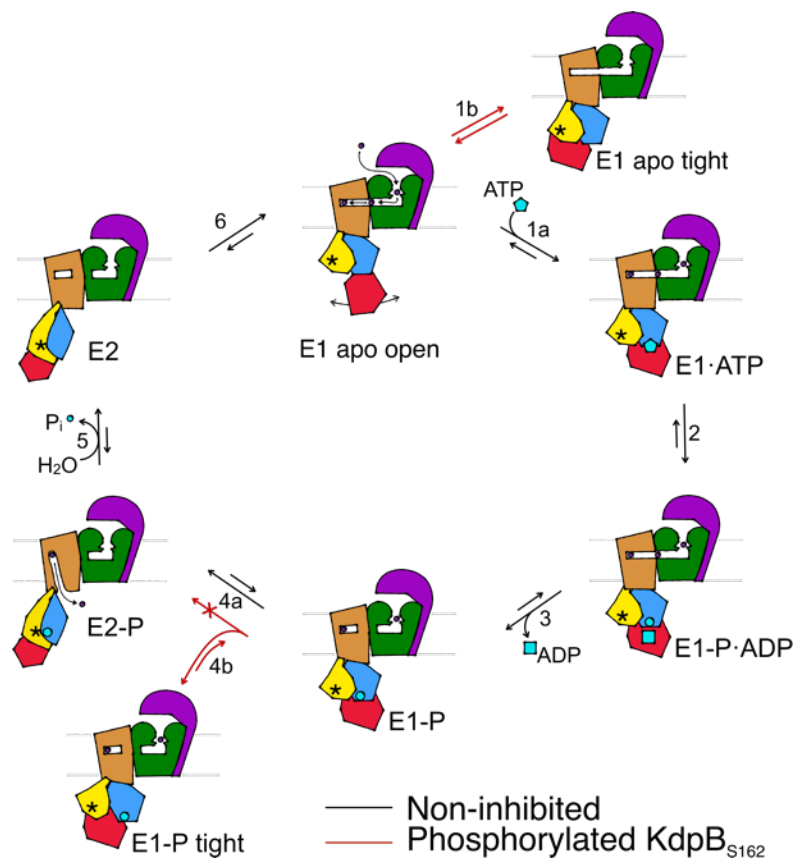

384

385 **Figure 6: Proposed transport cycle of KdpFABC in the absence and presence of regulatory phosphorylation**  
 386 **at KdpB<sub>S162</sub>.** Black arrows indicate the non-inhibited catalytic cycle, while red arrows denote the transitions taken  
 387 when KdpB<sub>S162</sub> is phosphorylated, and the complex is inhibited. ATP shown as cyan pentagon; ADP as cyan  
 388 rectangle; phosphorylated KdpB<sub>D307</sub> as cyan circle; K<sup>+</sup> ions in dark purple; the position of the TGES<sub>S162</sub> loop in the  
 389 A domain as an asterisk; KdpF is removed for simplicity.

390

391 The catalytic conformations identified here closely adhere to the classical Post-Albers cycle of  
 392 KdpFABC (Video 1). In the outward-facing E1 apo open state, the nucleotide binding domain  
 393 is widely accessible, and the N domain shows a high degree of flexibility, which likely  
 394 enhances the efficiency of nucleotide binding from the environment. Once a nucleotide is  
 395 bound, the N domain reorients towards the P domain for shared coordination of the nucleotide  
 396 in the E1·ATP<sub>early</sub> state (Figure 6, transition 1a). This conformation shows a slightly more open  
 397 nucleotide-bound state than the previously reported AMPPCP-stabilized E1·ATP state, which  
 398 likely can progress closer to ATP hydrolysis (Silberberg et al., 2021; Sweet et al., 2021).  
 399 Subsequently, ATP cleavage leads to the phosphorylation of the catalytic KdpB<sub>D307</sub> in the P  
 400 domain, forming the E1-P·ADP intermediate (Figure 6, transition 2), which could be

401 structurally isolated in this study under turnover conditions. The accumulation of the  
402 E1-P·ADP state in both turnover samples analyzed in this study suggests that ADP and Mg<sup>2+</sup>  
403 release (Figure 6, transition 3) is the rate-limiting step of KdpFABC turnover. Following the  
404 catalytic cycle, the high-energy E1-P state progresses to the E2-P state, whereby large  
405 rearrangements bring the conserved TGES<sub>162</sub> loop in the A domain near the catalytic site of the  
406 P domain. This transition is accompanied by conformational changes in the TMD of KdpB,  
407 which switches the complex from an outward- to an inward-open state with respect to the CBS  
408 (Figure 6, transition 4a). K<sup>+</sup> is released to the cytosol and KdpB<sub>D307-P</sub> is dephosphorylated by  
409 the TGES<sub>162</sub> loop (Figure 6, transition 5). Subsequently, the complex cycles back to the E1 apo  
410 open state (Figure 6, transition 6).

411 Whereas the structures obtained for KdpFAB<sub>S162-P</sub>C in the E1 apo open, E1·ATP, E1-P·ADP  
412 and E2-P conformations align well with corresponding states in the Post-Albers cycle of other  
413 P-type ATPases, the nucleotide-free E1 apo tight and E1-P tight states do not. Their overall  
414 compact fold is facilitated by KdpB<sub>S162-P</sub>, which increases the contacts of the N and A domains.  
415 While the compact fold itself is not the main cause of stalling KdpFABC, it might contribute  
416 to stabilizing the inhibited complex limiting the innate flexibility of the N domain. Thus, the  
417 E1 apo tight state likely has no major physiological relevance, as in presence of ATP, it would  
418 progress through the catalytic cycle up to the point of inhibition.

419 By contrast, we propose that the E1-P tight state is involved in stalling the KdpFABC complex.  
420 We suggest that this state represents the biochemically described E1-P inhibited state (Sweet  
421 et al., 2020), and is adopted after ADP release from the high-energy E1-P state, when  
422 KdpFABC attempts to relax into the E2-P state (Figure 6, transition 4b). This attempt would  
423 explain the partial tilt of the A domain in helix 4, observed only in the E1-P tight structure. As  
424 suggested before (Sweet et al., 2020), the full relaxation to the E2-P state is however hindered  
425 in the inhibited KdpFAB<sub>S162-P</sub>C by a repulsion between the catalytic phosphate in the P domain

426 (KdpB<sub>D307-P</sub>) and the inhibitory phosphate in the A domain (KdpB<sub>S162-P</sub>), which would come in  
427 close proximity during the transition from E1-P to E2-P (Figure 6, transition 4a, Video 1). The  
428 adopted stalled E1-P tight state is likely an energetically favored conformation between E1-P  
429 and E2-P, easing the high-energy constraints around the phosphorylated KdpB<sub>D307</sub>. In good  
430 agreement with this hypothesis, KdpFAB<sub>S162-P</sub>C was stabilized in the E1-P tight conformation  
431 even in the presence of the inhibitor orthovanadate, known to otherwise stabilize an E2-P state.  
432 Notably, orthovanadate has the same charge distribution as the E1-P tight state with  
433 phosphorylated KdpB<sub>D307</sub>. By contrast, KdpFAB<sub>S162-P</sub>C in the presence of AlF<sub>4</sub><sup>-</sup>, which has a  
434 negative charge less, could previously be stabilized in an E2-P state (Stock et al., 2018), likely  
435 because the electrostatic repulsion is lower, making the E1-P/E2-P transition more favorable.  
436 For a long time, E1-P states of P-type ATPases have been biochemically characterized as high-  
437 energy intermediates. However, the structural determinants for this energetic unfavorability  
438 have yet to be described. The conformational changes we observe between the E1-P·ADP state  
439 and the relaxed E1-P tight conformation offer a first clue as to the regions involved in  
440 destabilizing the E1-P state and triggering the transition to the E2-P conformation. In the E1-P  
441 tight state, the electrostatic tensions of the E1-P·ADP state are eased by rearrangements of the  
442 catalytic aspartate and the surrounding side chains, likely supported by a pulling of the  
443 N domain on the D<sub>307</sub>KTG loop as it associates with the A domain during the E1-P to E1-P  
444 tight transition. This could be the main stabilizing role of the tight conformation in KdpB<sub>S162-P</sub>  
445 inhibition. Further, the structural differences in the E1-P tight state also involve a movement  
446 of helix 6 in the P domain, which is not in the immediate proximity of the catalytic KdpB<sub>D307</sub>  
447 phosphate. This helix is in close proximity to the A domain and next one of the two connections  
448 of the P domain to the TMD, which undergo large conformational changes during the E1/E2  
449 transition. Thus, it may be an important element in signaling the ATPase to initiate the  
450 transition to E2-P in the TMD from an outward- to an inward-facing state.

451 The regulation by inactive conformations outside the Post-Albers cycle has been postulated for  
452 other P-type ATPases (Dyla et al., 2020). Observation of translocation by the H<sup>+</sup> ATPase  
453 AHA2 on a single-molecule level revealed that the pump stochastically enters inactive states,  
454 from which it can return to its active form spontaneously (Veshaguri et al., 2016). These states  
455 are adopted from the E1 conformation, similar to the E1 apo tight state observed under  
456 nucleotide-free conditions for KdpFABC. However, no full inhibition in the E1-P state was  
457 observed for AHA2, indicating a different mechanism. A crystal structure of the Ca<sup>2+</sup> pump  
458 SERCA was also proposed to represent a non-Post-Albers state (Dyla et al., 2020; Toyoshima  
459 et al., 2000). However, the organization of the cytosolic domains differs significantly from the  
460 tight conformation seen for KdpB, and a physiological role for this structure remains unclear.  
461 Altogether, the structural basis for KdpFABC inhibition by KdpB<sub>S162</sub> phosphorylation  
462 described here, describes in detail the involvement of a non-Post-Albers conformation with a  
463 clear regulatory role in P-type ATPase turnover. It extends the conformational landscape and  
464 strongly supports the emerging idea of non-catalytic off-cycle conformations with important  
465 physiological roles.

## 466 **Conclusion**

467 The data presented here illuminates the structural basis for KdpFABC inhibition by KdpB<sub>S162</sub>  
468 phosphorylation. We show that stalled KdpFABC adopts a novel conformation, which is either  
469 an intermediate of the E1-P/E2-P transition, or a separate state into which the A and P domains  
470 relax when the transition to the E2-P state is hindered. Moreover, the N domain in the inhibited  
471 KdpFAB<sub>S162-P</sub>C associates closely with the A domain in a non-Post-Albers conformation that  
472 likely further stabilizes the complex during inhibition. These results prove the involvement of  
473 off-cycle states in P-type ATPase regulation, and strongly support the burgeoning discussion  
474 of non-Post-Albers states of physiological relevance in the conformational landscapes of ion  
475 pumps. Further studies will be required to resolve how the phosphorylation of KdpB<sub>S162</sub> is  
476 mediated, and fully illuminate the destabilization of the E1-P state and subsequent transition to  
477 the E2-P state.

478

## 479 **Materials and Methods**

### 480 **Cloning, protein production and purification**

481 *Escherichia coli kdpFABC* (UniProt IDs: P36937 (KdpF), P03959 (KdpA), P03960 (KdpB),  
482 and P03961 (KdpC)) and its cysteine-free variant (provided by J.C. Greie, Osnabrück,  
483 Germany) were cloned into FX-cloning vector pBXC3H (pBXC3H was a gift from Raimund  
484 Dutzler & Eric Geertsma (Geertsma and Dutzler, 2011) (Addgene plasmid # 47068)) resulting  
485 in pBXC3H-KdpFABC and pBXC3H-KdpFABC $\Delta$ Cys, respectively.  
486 pBXC3H-KdpFABS<sub>162A</sub>C and pBXC3H-KdpFAB<sub>D307N</sub>C were created from  
487 pBXC3H-KdpFABC by site-directed mutagenesis. Plasmids encoding variants used in EPR  
488 experiments include pBXC3H-KdpFAB<sub>D307N/A407C/A494C</sub>C $\Delta$ Cys and  
489 pBXC3H-KdpFAB<sub>S162A/D307N/A407C/A494C</sub>C $\Delta$ Cys, and were created by site-directed mutagenesis  
490 based on pBXC3H-KdpFABC $\Delta$ Cys.

491 KdpFABC and KdpFABC variants for structural analysis and pulsed EPR measurements were  
492 produced in *E. coli* LB2003 cells (available from the Hänelt group upon request) transformed  
493 with the respective plasmids in 12 L of KML (100  $\mu$ g/ml ampicillin). Cell growth and  
494 harvesting was carried out as described previously (Stock et al., 2018). KdpFABC and  
495 KdpFABC variants were purified as previously described for wild-type KdpFABC (Stock et  
496 al., 2018).

497

### 498 **Cryo-EM sample preparation**

#### 499 *Wild type KdpFABC under turnover conditions*

500 Purified wild-type KdpFABC was concentrated to 5 mg/ml and supplemented with 50 mM  
501 KCl and 2 mM ATP. The sample was incubated at room temperature for 5 min before grid  
502 preparation.

#### 503 *Wild type KdpFABC stabilized by orthovanadate*

504 Purified wild-type KdpFABC was concentrated to 4 mg/ml and supplemented with 0.2 mM  
505 orthovanadate and 1 mM KCl before grid preparation.

506 *KdpFAB<sub>S162A</sub>C under turnover conditions*

507 Purified KdpFAB<sub>S162A</sub>C, in which the inhibitory phosphorylation in KdpB is prevented by the  
508 mutation of the phosphorylated KdpB<sub>S162</sub> to alanine, was concentrated to 3.4 mg/ml and  
509 supplemented with 50 mM KCl and 2 mM ATP. The sample was incubated at room  
510 temperature for 5 min before grid preparation.

511 *KdpFAB<sub>D307N</sub>C under nucleotide-free conditions*

512 Purified KdpFAB<sub>D307N</sub>C, which is prevented from progressing into an E1-P state by the  
513 mutation of the catalytic KdpB<sub>D307</sub> to an asparagine, was concentrated to 4 mg/ml and  
514 supplemented with 50 mM KCl before grid preparation.

515

516 **Cryo-EM grid preparation**

517 For wild-type KdpFABC with orthovanadate and nucleotide-free KdpFAB<sub>D307N</sub>C, 2.8 µl of  
518 sample were applied to holey-carbon cryo-EM grids (Quantifoil Au R1.2/1.3, 200 mesh),  
519 which were previously glow-discharged at 5 mA for 20 s. Grids were blotted for 3 - 5 s in a  
520 Vitrobot (Mark IV, Thermo Fisher Scientific) at 20 °C and 100% humidity, and subsequently  
521 plunge-frozen in liquid propane/ethane and stored in liquid nitrogen until further use.

522 For the turnover samples of wild-type KdpFABC and KdpFAB<sub>S162A</sub>C, 2.8 µl of sample were  
523 applied to holey-carbon cryo-EM grids (Quantifoil Au R1.2/1.3, 300 mesh), which were  
524 previously twice glow-discharged at 15 mA for 45 s. Grids were blotted for 2 - 6 s in a Vitrobot  
525 (Mark IV, Thermo Fisher Scientific) at 4 °C and 100% humidity, and subsequently plunge-  
526 frozen in liquid ethane and stored in liquid nitrogen until further use.

## 527 **Cryo-EM data collection**

528 Cryo-EM data were collected on a 200 keV Talos Arctica microscope (Thermo Fisher  
529 Scientific) equipped with a post-column energy filter (Gatan) in zero-loss mode, using a 20 eV  
530 slit, a 100  $\mu\text{m}$  objective aperture, in an automated fashion provided by EPU software (Thermo  
531 Fisher Scientific) or serialEM (Mastronarde, 2005; Schorb et al., 2019) on a K2 summit  
532 detector (Gatan) in counting mode. Cryo-EM images were acquired at a pixel size of 1.012  $\text{\AA}$   
533 (calibrated magnification of 49,407 $\times$ ), a defocus range from -0.5 to -2  $\mu\text{m}$ , an exposure time of  
534 9 sec and a sub-frame exposure time of 150 ms (60 frames), and a total electron exposure on  
535 the specimen level of about 52 electrons per  $\text{\AA}^2$ . Data collection was optimized by restricting  
536 the acquisition to regions displaying optimal sample thickness using an in-house written script  
537 (Rheinberger et al., 2021) and data quality was monitored on-the-fly using the software  
538 FOCUS (Biyani et al., 2017).

539

## 540 **Cryo-EM data processing**

541 For all datasets, the SBGrid (Morin et al., 2013) software package tool was used to manage the  
542 software packages.

### 543 *KdpFAB<sub>S162A</sub>C under turnover conditions*

544 Pre-processing of the acquired data was performed as described above, resulting in the  
545 selection of 9,170 out of 11,482 images, which were used for further analysis with the software  
546 packages cryoSPARC 3.2.0 (Punjani et al., 2017) and RELION 3.1.1 (Zivanov et al., 2018).  
547 First, crYOLO 1.7.6 (Wagner et al., 2019) was used to automatically pick 287,232 particles  
548 using a loose threshold. Particle coordinates were imported in RELION 3.1.1 (Zivanov et al.,  
549 2018), and the particles were extracted with a box size of 240 pixels. Non-protein classes were  
550 removed with a single round of 2D classification in cryoSPARC 3.2.0 (Punjani et al., 2017),  
551 resulting in 167,721 particles (initial particle set). These particles were then subjected to ab-



552 initio 3D reconstruction in cryoSPARC 3.2.0 (Punjani et al., 2017), and the best two output  
553 classes were used in subsequent jobs in an iterative way in RELION 3.1.1 (Zivanov et al.,  
554 2018). The dataset was from here on treated separately, with about 37.7% (63,240 particles) in  
555 the E2-P state and about 53.3% (89,378 particles) in the E1-P·ADP state. These particles were  
556 imported back into RELION 3.1.1, and subjected to 3D classification and refinement, against  
557 references obtained for the E1 tight and E1-P·ADP conformations. This resulted in a dataset of  
558 46,904 particles (~28% of the initial particle set) for the E2-P conformation, and of 70,068  
559 particles for the E1-P·ADP conformation. Several rounds of CTF refinement (Zivanov et al.,  
560 2018) were performed, using per-particle CTF estimation. The dataset for the E1-P·ADP  
561 conformation was subjected to a round of focused 3D classification with no image alignment,  
562 using a mask on the flexible A and N domains of KdpB (Hiraizumi et al., 2019). This resulted  
563 in a cleaned dataset of 58,243 particles (~35% of the initial particle set) for the E1-P·ADP state.  
564 In the last refinement iteration, a mask excluding the micelle was used and the refinement was  
565 continued until convergence (focused refinement), yielding a final map for the E2-P state at a  
566 resolution of 4.3 Å and 4.0 Å after post-processing and masking, sharpened using an isotropic  
567 b-factor of -160 Å<sup>2</sup>. The final map for the E1-P·ADP state had a resolution of 4.0 Å after  
568 refinement and 3.7 Å after post-processing and masking, and was sharpened using an isotropic  
569 b-factor of -123 Å<sup>2</sup>.

#### 570 *Wild type KdpFABC under turnover conditions*

571 A total of 17,938 dose-fractionated cryo-EM images were recorded and subjected to motion-  
572 correction and dose-weighting of frames by MotionCor2 (Zheng et al., 2017). The CTF  
573 parameters were estimated on the movie frames by ctfind4.1.4 (Rohou and Grigorieff, 2015).  
574 Bad images showing contamination, a defocus below -0.5 or above -2.0 μm, or a bad CTF  
575 estimation were discarded, resulting in 14,604 images used for further analysis with the  
576 software packages cryoSPARC 3.2.0 (Punjani et al., 2017) and RELION 3.1.1 (Zivanov et al.,

577 2018). First, crYOLO 1.7.6 (Wagner et al., 2019) was used to automatically pick 1,128,433  
578 particles using a loose threshold. Particle coordinates were imported in RELION 3.1.1  
579 (Zivanov et al., 2018), and the particles were extracted with a box size of 240 pixels. Non-  
580 protein classes were removed with a single round of 2D classification in cryoSPARC 3.2.0  
581 (Punjani et al., 2017), resulting in 828,847 particles (initial particle set). These particles were  
582 then subjected to ab-initio 3D reconstruction in cryoSPARC 3.2.0 (Punjani et al., 2017), and  
583 the best three output classes were used in subsequent jobs in an iterative way in RELION 3.1.1  
584 (Zivanov et al., 2018). The dataset was from here on treated separately, with about 33.2%  
585 (275,026 particles) in the E1-P tight state and about 55.1% (346,303 and 110,601 particles) in  
586 the E1 nucleotide bound state. These particles were imported back into RELION 3.1.1, and  
587 subjected to 3D classification and refinement, against references obtained for the E1 tight and  
588 E1·ATP conformations. Several rounds of CTF refinement (Zivanov et al., 2018) were  
589 performed, using per-particle CTF estimation, before subjecting all datasets to a round of  
590 focused 3D classification with no image alignment, using a mask on the flexible A and N  
591 domains of KdpB (Hiraizumi et al., 2019). This resulted in a cleaned dataset of 114,588  
592 particles (~14% of the initial particle set) for the E1-P tight state, and 277,912 and 80,798 for  
593 the E1 nucleotide bound conformations. The latter two were merged and subjected to several  
594 rounds of CTF refinement (Zivanov et al., 2018) using per-particle CTF estimation, before  
595 subjecting the dataset to another round of focused 3D classification with no image alignment,  
596 using a mask on the flexible A and N domains of KdpB (Hiraizumi et al., 2019). This resulted  
597 in two distinct datasets of 257,675 particles (~31% of the initial particle set) for the E1-P·ADP  
598 conformation and of 76,121 particles (~9% of the initial particle set) for the E1·ATP  
599 conformation. In the last refinement iteration, a mask excluding the micelle was used and the  
600 refinement was continued until convergence (focused refinement), yielding a final map for the  
601 E1-P tight state at a resolution of 3.7 Å and 3.4 Å after post-processing and masking, sharpened

602 using an isotropic b-factor of  $-134 \text{ \AA}^2$ . The final map for the E1-P·ADP state had a resolution  
603 of  $3.4 \text{ \AA}$  after refinement and  $3.1 \text{ \AA}$  after post-processing and masking, and was sharpened  
604 using an isotropic b-factor of  $-122 \text{ \AA}^2$ . The final map for the E1·ATP state had a resolution of  
605  $3.9 \text{ \AA}$  after refinement and  $3.5 \text{ \AA}$  after post-processing and masking, and was sharpened using  
606 an isotropic b-factor of  $-132 \text{ \AA}^2$ . No symmetry was imposed during 3D classification or  
607 refinement.

#### 608 *Wild type KdpFABC with orthovanadate*

609 Pre-processing of the acquired data was performed as described above, resulting in the  
610 selection of 2,014 out of 2,488 images, which were used for further analysis with the software  
611 package RELION 3.0.8 (Zivanov et al., 2018). First, crYOLO 1.3.1 (Wagner et al., 2019) was  
612 used to automatically pick 164,891 particles using a loose threshold. Particle coordinates were  
613 imported in RELION 3.0.8 (Zivanov et al., 2018), and the particles were extracted with a box  
614 size of 240 pixels. Non-protein classes were removed with 2D classification, resulting in  
615 120,077 particles (initial particle set). For 3D classification and refinement, the map of the  
616 previously generated E1 conformation EMD-0257 (Stock et al., 2018) was used as reference  
617 for the first round, and the two best output classes were used in subsequent jobs in an iterative  
618 way. The dataset was from here on treated separately, with about 70.9% (85,102 particles) in  
619 the E1-P tight state and about 11.2% (13,508 particles) in the E2-P state. Sequentially, on the  
620 E1-P tight dataset several rounds of CTF refinement, using per-particle CTF estimation, and  
621 Bayesian polishing were performed (Zivanov et al., 2018), before subjecting the dataset to a  
622 round of focused 3D classification with no image alignment, using a mask on the flexible A  
623 and N domains of KdpB (Hiraizumi et al., 2019). This resulted in a cleaned dataset of 74,927  
624 particles (~62% of the initial particle set) for the E1-P tight state, and was subjected to several  
625 rounds of CTF refinement, using per-particle CTF estimation, and Bayesian polishing (Zivanov  
626 et al., 2018). In the last refinement iteration, a mask excluding the micelle was used and the

627 refinement was continued until convergence (focused refinement), yielding a final map for the  
628 E1-P tight state at a resolution of 3.3 Å, and 3.3 Å after post-processing and masking, sharpened  
629 using an isotropic b-factor of -55 Å<sup>2</sup>. The final map for the E2-P state (from ~11% of the initial  
630 particle set) had a resolution of 8.7 Å after refinement and 7.4 Å after post-processing and  
631 masking, and was sharpened using an isotropic b-factor of -195 Å<sup>2</sup>. No symmetry was imposed  
632 during 3D classification or refinement.

### 633 *KdpFAB<sub>D307N</sub>C under nucleotide-free conditions*

634 Pre-processing of the acquired data was performed as described above, resulting in the  
635 selection of 12,864 out of 17,889 images, which were used for further analysis with the  
636 software package RELION 3.0.8 (Zivanov et al., 2018). First, crYOLO 1.3.1 (Wagner et al.,  
637 2019) was used to automatically pick 728,674 particles using a loose threshold. Particle  
638 coordinates were imported in RELION 3.0.8 (Zivanov et al., 2018), and the particles were  
639 extracted with a box size of 240 pixels. Non-protein classes were removed in several rounds of  
640 2D classification, resulting in 469,466 particles (initial particle set). Due to the large  
641 conformational differences between both states, the full dataset was further cleaned by two  
642 independent 3D classifications against references obtained for the E1 tight state or the E1 apo  
643 open state. Particles belonging to the best classes of both runs were merged and duplicates  
644 subtracted, resulting in 306,942 particles that were subjected to a multi-reference 3D  
645 classification with no image alignment. The dataset was from here on treated separately, with  
646 about 33.7% (158,353 particles) in the E1 tight state and about 31.4% (147,589 particles) in  
647 the open state. Several rounds of CTF refinement (Zivanov et al., 2018) were performed, using  
648 per-particle CTF estimation, before subjecting both datasets to a round of focused 3D  
649 classification with no image alignment, using a mask on the flexible A and N domains of KdpB  
650 (Hiraizumi et al., 2019). This resulted in a cleaned dataset of 88,852 particles (~19% of the  
651 initial particle set) for the E1 tight state, 75,711 particles (~16% of the initial particle set) for

652 the E1 apo open state 1, and 47,981 particles (~10% of the initial particle set) for the E1 apo  
653 open state 2. In the last refinement iteration, a mask excluding the micelle was used and the  
654 refinement was continued until convergence (focused refinement), yielding a final map for the  
655 E1 tight state at a resolution of 3.8 Å and 3.4 Å after post-processing and masking, sharpened  
656 using an isotropic b-factor of -113 Å<sup>2</sup>. The final map for the E1 apo open state 1 had a resolution  
657 of 3.9 Å after refinement and 3.5 Å after post-processing and masking, and was sharpened  
658 using an isotropic b-factor of -117 Å<sup>2</sup>. The final map for the E1 apo open state 2 had a resolution  
659 of 4.0 Å after refinement and 3.7 Å after post-processing and masking, and was sharpened  
660 using an isotropic b-factor of -119 Å<sup>2</sup>. For 3D classification and refinement, the map of the  
661 previously generated E1 conformation [EMD-0257] (Stock et al., 2018) was used as reference  
662 for the first round, and the best output class was used in subsequent jobs in an iterative way.  
663 For all datasets, local resolution estimates were calculated by RELION and no symmetry was  
664 imposed during 3D classification or refinement. All resolutions were estimated using the 0.143  
665 cut-off criterion (Rosenthal and Henderson, 2003) with gold-standard Fourier shell correlation  
666 (FSC) between two independently refined half maps. During post-processing, the approach of  
667 high-resolution noise substitution was used to correct for convolution effects of real-space  
668 masking on the FSC curve (Chen et al., 2013).

669

## 670 **Model building and validation**

671 Available KdpFABC structures like E1·ATP conformation [7NNL], E1 [6HRA] and E2  
672 conformation [6HRB] were docked into the obtained cryo-EM maps using UCSF Chimera  
673 (Pettersen et al., 2004) and used as initial models. Wherever required, rigid body movements  
674 were applied to accommodate for conformational changes, and models were subjected to an  
675 iterative process of real space refinement using Phenix.real\_space\_refinement with secondary  
676 structure restraints (Afonine et al., 2018; Liebschner et al., 2019) followed by manual

677 inspection and adjustments in Coot (Emsley and Cowtan, 2004). K<sup>+</sup> ions, cardiolipin, ATP,  
678 ADP, Pi, and orthovanadate were modelled into the cryo-EM maps in Coot. The final models  
679 were refined in real space with Phenix.real\_space\_refinement with secondary structure  
680 restraints (Afonine et al., 2018; Liebschner et al., 2019). For validation of the refinement, FSCs  
681 (FSC<sub>sum</sub>) between the refined models and the final maps were determined. To monitor the  
682 effects of potential over-fitting, random shifts (up to 0.5 Å) were introduced into the  
683 coordinates of the final model, followed by refinement against the first unfiltered half-map.  
684 The FSC between this shaken-refined model and the first half-map used during validation  
685 refinement is termed FSC<sub>work</sub>, and the FSC against the second half-map, which was not used at  
686 any point during refinement, is termed FSC<sub>free</sub>. The marginal gap between the curves describing  
687 FSC<sub>work</sub> and FSC<sub>free</sub> indicate no over-fitting of the model. The geometries of the atomic models  
688 were evaluated by MolProbity (Williams et al., 2018).

689

#### 690 **EPR sample purification, preparation, data acquisition and analysis**

691 KdpFAB<sub>A407C/A494C</sub>ΔCys, KdpFAB<sub>D307N/A407C/A494C</sub>ΔCys and  
692 KdpFAB<sub>S162A/D307N/A407C/A494C</sub>ΔCys, variants based on an otherwise Cys-less background,  
693 were produced and purified as described for KdpFAB<sub>G150C/A407C</sub>ΔCys (Stock et al., 2018).  
694 Purified and spin-labeled KdpFABCΔCys variants were concentrated to 4 - 7 mg ml<sup>-1</sup> and  
695 supplemented with 14% deuterated glycerol (v/v) and 50 mM KCl. 5 mM AMPPCP stabilizing  
696 the E1-ATP conformations was added when indicated.

697 Pulsed EPR measurements were performed at Q band (34 GHz) and -223 °C on an ELEXSYS-  
698 E580 spectrometer (Bruker). For this, 15 µl of the freshly prepared samples were loaded into  
699 EPR quartz tubes with a 1.6 mm outer diameter and shock frozen in liquid nitrogen. During  
700 the measurements, the temperature was controlled by the combination of a continuous-flow  
701 helium cryostat (Oxford Instruments) and a temperature controller (Oxford Instruments). The

702 four-pulse DEER sequence was applied (Pannier et al., 2011) with observer pulses of 32 ns  
703 and a pump pulse of 12 - 14 ns. The frequency separation was set to 70 MHz and the frequency  
704 of the pump pulse to the maximum of the nitroxide EPR spectrum. Validation of the distance  
705 distributions was performed by means of the validation tool included in DeerAnalysis (Jeschke  
706 et al., 2006) and varying the parameters “Background start” and “Background density” in the  
707 suggested range by applying fine grid. A prune level of 1.15 was used to exclude poor fits.  
708 Furthermore, interspin distance predictions were carried out by using the rotamer library  
709 approach included in the MMM software package (Jeschke, 2018; Polyhach et al., 2010). The  
710 calculation of the interspin distance predictions is based on the cryo-EM structures of the E1  
711 tight, E1 apo open, and E1·ATP conformations for the comparison with the experimentally  
712 determined interspin distance distributions.

713

#### 714 **Molecular dynamics simulations**

715 Molecular dynamics (MD) simulations were built using the coordinates of eight states of the  
716 complex (see Table 3). To reduce the size of the simulation box, KdpA and KdpC were  
717 removed from the system, as these were considered unlikely to impact the dynamics of the N,  
718 P, and A domains in the timescales simulated. The systems were described with the  
719 CHARMM36m force field (Best et al., 2012; Huang et al., 2016) and built into POPE  
720 membranes with TIP3P waters and K<sup>+</sup> and Cl<sup>-</sup> to 150 mM, using CHARMM-GUI (Jo et al.,  
721 2007; Lee et al., 2016). Where present, KdpB<sub>S162</sub> was phosphorylated for each system, and for  
722 the E1·ATP and E1·P·ADP states, the nucleotide was included based on the structural  
723 coordinates. Where present, the K<sup>+</sup> bound in the CBS was preserved.

724 Each system was minimized using the steepest descents method, then equilibrated with  
725 positional restraints on heavy atoms for 100 ps in the NPT ensemble at 310 K with the V-  
726 rescale thermostat and a 1 ps coupling time constant, and semi-isotropic Parrinello-Rahman

727 pressure coupling at 1 atm, with a 5 ps coupling time constant (Bussi et al., 2007; Parrinello  
728 and Rahman, 1981). Production simulations were run using 2 fs time steps over 50 ns, with 3  
729 repeats run for each state. The simulations were kept relatively short to preserve the  
730 conformation of the input structures, whilst allowing sufficient conformational flexibility to  
731 sample the side chain motions and rearrangements within the given state. Removal of KdpA  
732 and KdpC did not appear to reduce the stability of KdpBF, as all systems had moderate-low  
733 backbone RMSDs at the end of the simulations (see Table 3).

734 **Table 2: Details of MD simulations run.** All simulations were run in POPE membranes, over 3 x 50 ns.  
735 RMSDs are the mean and standard deviations over three repeats.

| State                                      | RMSD (nm)      |
|--------------------------------------------|----------------|
| E1 apo open 1 (nucleotide-free)            | 0.47 ± 0.09 nm |
| E1 apo open 2 (nucleotide-free)            | 0.55 ± 0.12 nm |
| E1 apo tight (nucleotide-free)             | 0.32 ± 0.08 nm |
| E1·ATP <sub>early</sub> (turnover WT)      | 0.35 ± 0.04 nm |
| E1-P·ADP (turnover WT)                     | 0.51 ± 0.04 nm |
| E1-P·ADP (turnover KdpB <sub>S162A</sub> ) | 0.30 ± 0.06 nm |
| E1-P tight (turnover WT)                   | 0.31 ± 0.04 nm |
| E1-P tight (orthovanadate)                 | 0.27 ± 0.03 nm |

736  
737 Contact analysis was performed by counting the number of residues from each domain which  
738 were within 0.4 nm of a residue from a different domain, for every frame over 3 x 50 ns  
739 simulation. The domains were defined as the following residues of KdpB: A domain = 89 -  
740 214, N domain = 314 - 450, P-domain = 277 - 313 and 451 - 567. Contact analysis was run  
741 with the Gromacs tool `gmx select`.

742 High-frequency contacting residue pairs were identified as any pair of residues in contact for  
743 at least 90% of frames over 3 x 50 ns of simulation time. Analyses were run using MDAnalysis  
744 (Michaud-Agrawal et al., 2011) and plotted using NumPy (Harris et al., 2020) and Matplotlib  
745 (Hunter, 2007).

746 All simulations were run in Gromacs 2019 (Berendsen et al., 1995).



747

## 748 **Figure preparation**

749 All figures were prepared using USCF Chimera (Pettersen et al., 2004), UCSF ChimeraX  
750 (Pettersen et al., 2021), VMD (Humphrey et al., 1996), OriginPro 2016, and GraphPad Prism  
751 8 and 9.

752

## 753 **Data availability**

754 Data supporting the findings of this manuscript are available from the corresponding authors  
755 upon request. The three-dimensional cryo-EM densities and corresponding modelled  
756 coordinates of KdpFABC have been deposited in the Electron Microscopy Data Bank and the  
757 Protein Data Bank under the accession numbers summarized in Table 3. The depositions  
758 include maps calculated with higher b-factors, both half-maps and the mask used for the final  
759 FSC calculation.

760

761 **Table 3: EMDB and PDB accession codes of structure depositions.**

| State                                                  | EMDB #    | PDB # |
|--------------------------------------------------------|-----------|-------|
| E1-ATP <sub>early</sub> (turnover WT)                  | EMD-14913 | 7ZRG  |
| E1-P-ADP (turnover WT)                                 | EMD-14917 | 7ZRK  |
| E1-P tight (turnover WT)                               | EMD-14912 | 7ZRE  |
| E1-P tight (orthovanadate)                             | EMD-14911 | 7ZRD  |
| E2-P (orthovanadate)                                   | EMD-14347 | N/A   |
| E1-P-ADP (turnover KdpB <sub>S162A</sub> )             | EMD-14919 | 7ZRM  |
| E2-P (turnover KdpB <sub>S162A</sub> )                 | EMD-14918 | 7ZRL  |
| E1 apo tight (nucleotide-free KdpB <sub>D307N</sub> )  | EMD-14914 | 7ZRH  |
| E1 apo open 1 (nucleotide-free KdpB <sub>D307N</sub> ) | EMD-14915 | 7ZRI  |
| E1 apo open 2 (nucleotide-free KdpB <sub>D307N</sub> ) | EMD-14916 | 7ZRJ  |

762

763 Table 4: Key resources table.

| Reagent type (species) or resource                    | Designation                                                                | Source or reference               | Identifiers            | Additional information               |
|-------------------------------------------------------|----------------------------------------------------------------------------|-----------------------------------|------------------------|--------------------------------------|
| Gene ( <i>Escherichia coli</i> )                      | <i>kdpFABC</i>                                                             |                                   | Uniprot IDs:           |                                      |
|                                                       |                                                                            |                                   | <i>kdpF</i> : P36937   |                                      |
|                                                       |                                                                            |                                   | <i>kdpA</i> : P03959   |                                      |
|                                                       |                                                                            |                                   | <i>kdpB</i> : P03960   |                                      |
|                                                       |                                                                            |                                   | <i>kdpC</i> : P03961   |                                      |
| Plasmid (backbone)                                    | <i>pBXC3H</i>                                                              | doi: 10.1007/978-1-62703-764-8_11 | Addgene catalog #47068 |                                      |
| Strain, strain background ( <i>Escherichia coli</i> ) | LB2003 (F <sup>-</sup> <i>thi metE rpsL gal rha kup1 ΔkdpFABC5 ΔtrkA</i> ) | doi: 10.1007/s002030050425        |                        |                                      |
| Sequence-based reagent                                | <i>kdpB_S162A_for</i>                                                      | Eurofins Genomics (Luxembourg)    |                        | 5'-GCGCCATCACCGGGGAAGCGGCACC-3'      |
| Sequence-based reagent                                | <i>kdpB_S162A_for</i>                                                      | Eurofins Genomics (Luxembourg)    |                        | 5'-ACCGGTGCCGCTTCCCCGGTGATGG-3'      |
| Sequence-based reagent                                | <i>kdpB_D307N_for</i>                                                      | Eurofins Genomics (Luxembourg)    |                        | 5'-GCTACTGAATAAAACCGGCACCATCAC-3'    |
| Sequence-based reagent                                | <i>kdpB_D307N_rev</i>                                                      | Eurofins Genomics (Luxembourg)    |                        | 5'-GGTGCCGGTTTTATTTCAGTAGCAGAACG-3'  |
| Sequence-based reagent                                | <i>kdpB_A407C_for</i>                                                      | Eurofins Genomics (Luxembourg)    |                        | 5'-CATTCGTCGCCATGTTGAGTGTAACGG-3'    |
| Sequence-based reagent                                | <i>kdpB_A407C_rev</i>                                                      | Eurofins Genomics (Luxembourg)    |                        | 5'-CGTTACTCAACATGGCGACGAATGG-3'      |
| Sequence-based reagent                                | <i>kdpB_A494C_for</i>                                                      | Eurofins Genomics (Luxembourg)    |                        | 5'-GATTTTCTCGCCGAATGTACACCGGAGGCC-3' |
| Sequence-based reagent                                | <i>kdpB_A494C_rev</i>                                                      | Eurofins Genomics (Luxembourg)    |                        | 5'-GGCCTCCGGTGTACATTCGCGGAGAAAATC-3' |

|                       |                                            |                                                                                                                                                                                                                                                                             |  |  |
|-----------------------|--------------------------------------------|-----------------------------------------------------------------------------------------------------------------------------------------------------------------------------------------------------------------------------------------------------------------------------|--|--|
| EPR spin label        | MTSSL                                      | Toronto Research Chemicals Inc., North York, Canada                                                                                                                                                                                                                         |  |  |
| Reagent               | Orthovanadate                              | Merck KGaA, Darmstadt, Germany                                                                                                                                                                                                                                              |  |  |
| Reagent               | Adenosine 5'-triphosphate                  | Merck KGaA, Darmstadt, Germany                                                                                                                                                                                                                                              |  |  |
| Software              | DeerAnalysis                               | doi: 10.1007/BF03166213                                                                                                                                                                                                                                                     |  |  |
| Other (Cryo-EM Grids) | 200 and 300 mesh Au R1.2/1.3 cryo-EM grids | Quantifoil, Großlobichau, Germany                                                                                                                                                                                                                                           |  |  |
| Software, algorithm   | EPU v 2.3                                  | Thermo Fisher (Eindhoven, Netherlands)<br><a href="https://www.thermofisher.com/nl/en/home/electron-microscopy/products/software-em-3d-vis/epu-software.html">https://www.thermofisher.com/nl/en/home/electron-microscopy/products/software-em-3d-vis/epu-software.html</a> |  |  |
| Software, algorithm   | Sample thickness measurement script        | <a href="https://doi.org/10.1101/2020.12.01.392100">https://doi.org/10.1101/2020.12.01.392100</a>                                                                                                                                                                           |  |  |
| Software, algorithm   | Focus                                      | <a href="https://doi.org/10.1016/j.jsb.2017.03.007">https://doi.org/10.1016/j.jsb.2017.03.007</a><br><a href="https://focus.c-cina.unibas.ch/about.php">https://focus.c-cina.unibas.ch/about.php</a>                                                                        |  |  |
| Software, algorithm   | SBGrid                                     | <a href="https://doi.org/10.7554/eLife.01456">https://doi.org/10.7554/eLife.01456</a><br><a href="https://sbggrid.org/software/">https://sbggrid.org/software/</a>                                                                                                          |  |  |
| Software, algorithm   | MotionCor2                                 | <a href="https://doi.org/10.1038/nmeth.4193">https://doi.org/10.1038/nmeth.4193</a><br><a href="http://msg.ucsf.edu/em/software/motioncor2.html">http://msg.ucsf.edu/em/software/motioncor2.html</a>                                                                        |  |  |
| Software, algorithm   | Ctffind 4.1.13                             | <a href="https://doi.org/10.1016/j.jsb.2015.08.008">https://doi.org/10.1016/j.jsb.2015.08.008</a><br><a href="http://grigoriefflab.janelia.org/ctf">http://grigoriefflab.janelia.org/ctf</a>                                                                                |  |  |
| Software, algorithm   | Ctffind 4.1.14                             | <a href="https://doi.org/10.1016/j.jsb.2015.08.008">https://doi.org/10.1016/j.jsb.2015.08.008</a><br><a href="http://grigoriefflab.janelia.org/ctf">http://grigoriefflab.janelia.org/ctf</a>                                                                                |  |  |

|                     |                     |                                                                                                                                                                                                                                |  |  |
|---------------------|---------------------|--------------------------------------------------------------------------------------------------------------------------------------------------------------------------------------------------------------------------------|--|--|
| Software, algorithm | crYOLO 1.3.1        | <a href="https://doi.org/10.1038/s42003-019-0437-z">https://doi.org/10.1038/s42003-019-0437-z</a><br><a href="https://cryolo.readthedocs.io/en/stable/#">https://cryolo.readthedocs.io/en/stable/#</a>                         |  |  |
| Software, algorithm | crYOLO 1.7.6        | <a href="https://doi.org/10.1038/s42003-019-0437-z">https://doi.org/10.1038/s42003-019-0437-z</a><br><a href="https://cryolo.readthedocs.io/en/stable/#">https://cryolo.readthedocs.io/en/stable/#</a>                         |  |  |
| Software, algorithm | cryoSPARC 3.2.0     | <a href="https://doi.org/10.1038/nmeth.4169">https://doi.org/10.1038/nmeth.4169</a><br><a href="https://cryosparc.com">https://cryosparc.com</a>                                                                               |  |  |
| Software, algorithm | RELION 3.0.8        | <a href="https://doi.org/10.7554/eLife.42166">https://doi.org/10.7554/eLife.42166</a><br><a href="https://www2.mrc-lmb.cam.ac.uk/relion/">https://www2.mrc-lmb.cam.ac.uk/relion/</a>                                           |  |  |
| Software, algorithm | RELION 3.1.1        | <a href="https://doi.org/10.7554/eLife.42166">https://doi.org/10.7554/eLife.42166</a><br><a href="https://www2.mrc-lmb.cam.ac.uk/relion/">https://www2.mrc-lmb.cam.ac.uk/relion/</a>                                           |  |  |
| Software, algorithm | Coot 0.9            | <a href="https://doi.org/10.1107/S0907444904019158">https://doi.org/10.1107/S0907444904019158</a><br><a href="https://www2.mrc-lmb.cam.ac.uk/personal/pemsley/coot/">https://www2.mrc-lmb.cam.ac.uk/personal/pemsley/coot/</a> |  |  |
| Software, algorithm | Phenix 1.19.2       | <a href="https://doi.org/10.1107/S2059798318006551">https://doi.org/10.1107/S2059798318006551</a><br><a href="http://phenix-online.org/">http://phenix-online.org/</a>                                                         |  |  |
| Software, algorithm | Molprobit 4.5.1     | <a href="https://doi.org/10.1002/pro.3330">https://doi.org/10.1002/pro.3330</a><br><a href="http://molprobit.biochem.duke.edu">http://molprobit.biochem.duke.edu</a>                                                           |  |  |
| Software, algorithm | UCSF Chimera 1.15   | <a href="https://doi.org/10.1002/jcc.20084">https://doi.org/10.1002/jcc.20084</a><br><a href="https://www.cgl.ucsf.edu/chimera/">https://www.cgl.ucsf.edu/chimera/</a>                                                         |  |  |
| Software, algorithm | UCSF ChimeraX 1.1.1 | <a href="https://doi.org/10.1002/pro.3943">https://doi.org/10.1002/pro.3943</a><br><a href="https://www.rbvi.ucsf.edu/chimerax/">https://www.rbvi.ucsf.edu/chimerax/</a>                                                       |  |  |
| Software, algorithm | Origin Pro 2016     | OriginLab<br><a href="https://www.originlab.com/2016">https://www.originlab.com/2016</a>                                                                                                                                       |  |  |

|                        |                        |                                                                                                                                                                                                    |  |  |
|------------------------|------------------------|----------------------------------------------------------------------------------------------------------------------------------------------------------------------------------------------------|--|--|
| Software,<br>algorithm | Gromacs 2019.4         | <a href="https://doi.org/10.1016/0010-4655(95)00042-E">https://doi.org/10.1016/0010-4655(95)00042-E</a><br><a href="https://www.gromacs.org/">https://www.gromacs.org/</a>                         |  |  |
| Software,<br>algorithm | VMD 1.9.4a12           | <a href="https://doi.org/10.1016/0263-7855(96)00018-5">https://doi.org/10.1016/0263-7855(96)00018-5</a><br><a href="http://www.ks.uiuc.edu/Research/vmd/">http://www.ks.uiuc.edu/Research/vmd/</a> |  |  |
| Software,<br>algorithm | charmm-gui             | <a href="https://doi.org/10.1021/acs.jctc.5b00935">https://doi.org/10.1021/acs.jctc.5b00935</a><br><a href="http://www.charmm-gui.org/">http://www.charmm-gui.org/</a>                             |  |  |
| Software,<br>algorithm | MDAnalysis 1.0.1       | <a href="https://doi.org/10.1002/jcc.21787">https://doi.org/10.1002/jcc.21787</a><br><a href="https://www.mdanalysis.org/">https://www.mdanalysis.org/</a>                                         |  |  |
| Software,<br>algorithm | NumPy 1.20.0           | <a href="https://doi.org/10.1038/s41586-020-2649-2">https://doi.org/10.1038/s41586-020-2649-2</a><br><a href="https://numpy.org/">https://numpy.org/</a>                                           |  |  |
| Software,<br>algorithm | matplotlib 3.3.4       | <a href="https://doi.org/10.1109/MCSE.2007.55">https://doi.org/10.1109/MCSE.2007.55</a><br><a href="https://matplotlib.org/">https://matplotlib.org/</a>                                           |  |  |
| Software,<br>algorithm | GraphPad Prism 8 and 9 | <a href="https://www.graphpad.com/scientific-software/prism/">https://www.graphpad.com/scientific-software/prism/</a>                                                                              |  |  |

765 **Acknowledgements**

766 CP thanks Michiel Punter for IT support. JMS thanks Paul J.N. Böhm for assistance with  
767 cloning and cell growth. PJS acknowledges the University of Warwick Scientific Computing  
768 Research Technology Platform for computational access. The electron microscopy within this  
769 work is part of the research program National Roadmap for Large-Scale Research  
770 Infrastructure (NEMI), project number 184.034.014, which is financed by the Dutch Research  
771 Council (NWO).

772 **Competing interest**

773 No conflict of interest

774 **Author contributions**

775 Jakob M Silberberg: Validation, Formal analysis, Investigation, writing - original draft,  
776 writing – review & editing, visualization

777 Charlott Stock: Validation, Formal analysis, Investigation, writing - original draft, writing –  
778 review & editing, visualization

779 Lisa Hielkema: Validation, Formal analysis, Investigation, writing - original draft, writing –  
780 review & editing, visualization

781 Robin A Corey: Validation, Formal analysis, Investigation, writing - original draft, writing –  
782 review & editing, visualization

783 Dorith Wunnicke: Validation, Formal analysis, Investigation

784 Jan Rheinberger: Validation, Formal analysis, Investigation

785 Victor RA Dubach: Validation, Formal analysis, Investigation

786 Phillip J Stansfeld: Conceptualization, Writing – review & editing, Supervision, Project  
787 administration, Funding acquisition

788 Inga Hänel: Conceptualization, Writing – review & editing, Supervision, Project  
789 administration, Funding acquisition

790 Cristina Paulino: Conceptualization, Writing – review & editing, Supervision, Project  
791 administration, Funding acquisition

792 **Funding**

793 The work was funded by the NWO Veni grant (722.017.001) and the NWO Start-Up grant  
794 (740.018.016) to CP as well as by the DFG Emmy Noether grant (HA6322/3-1), the  
795 Heisenberg program (HA6322/5-1) and the Life Science Bridge Award by the Aventis  
796 Foundation to IH. Research in PJS's lab is funded by Wellcome (208361/Z/17/Z), the MRC  
797 (MR/S009213/1) and BBSRC (BB/P01948X/1, BB/R002517/1 and BB/S003339/1). JMS is  
798 funded by the State of Hesse in the LOEWE Schwerpunkt TRABITA and RAC is funded by  
799 Wellcome (208361/Z/17/Z). This project made use of time on ARCHER, ARCHER2 and  
800 JADE granted via the UK High-End Computing Consortium for Biomolecular Simulation,  
801 HECBioSim (<http://hecbiosim.ac.uk>), supported by EPSRC (grant no. EP/R029407/1). PJS  
802 thanks the Warwick Scientific Computing Research Technology platform for computational  
803 access.

## 804 References

- 805 Afonine P V, Poon BK, Read RJ, Sobolev O V, Terwilliger TC, Urzhumtsev A, Adams PD.  
806 2018. Real-space refinement in PHENIX for cryo-EM and crystallography. *Acta*  
807 *Crystallogr Sect D Struct Biol* **74**:531–544. doi:10.1107/S2059798318006551
- 808 Albers RW. 1967. Biochemical Aspects of Active Transport. *Annu Rev Biochem* **36**:727–756.  
809 doi:10.1146/annurev.bi.36.070167.003455
- 810 Altendorf K, Gassel M, Puppe W, Möllenkamp T, Zeeck A, Boddien C, Fendler K, Bamberg  
811 E, Dröse S. 1998. Structure and function of the Kdp-ATPase of *Escherichia coli*. *Acta*  
812 *Physiol Scand Suppl* **643**:137–46.
- 813 Berendsen HJC, van der Spoel D, van Drunen R. 1995. GROMACS: A message-passing  
814 parallel molecular dynamics implementation. *Comput Phys Commun* **91**:43–56.  
815 doi:10.1016/0010-4655(95)00042-E
- 816 Best RB, Zhu X, Shim J, Lopes PEM, Mittal J, Feig M, MacKerell AD. 2012. Optimization  
817 of the additive CHARMM all-atom protein force field targeting improved sampling of  
818 the backbone  $\phi$ ,  $\psi$  and side-chain  $\chi_1$  and  $\chi_2$  Dihedral Angles. *J Chem Theory Comput*  
819 **8**:3257–3273. doi:10.1021/ct300400x
- 820 Biyani N, Righetto RD, McLeod R, Caujolle-Bert D, Castano-Diez D, Goldie KN, Stahlberg  
821 H. 2017. Focus: The interface between data collection and data processing in cryo-EM.  
822 *J Struct Biol* **198**:124–133. doi:10.1016/j.jsb.2017.03.007
- 823 Bublitz M, Poulsen H, Morth JP, Nissen P. 2010. In and out of the cation pumps: P-Type  
824 ATPase structure revisited. *Curr Opin Struct Biol* **20**:431–439.  
825 doi:10.1016/j.sbi.2010.06.007
- 826 Bussi G, Donadio D, Parrinello M. 2007. Canonical sampling through velocity rescaling. *J*  
827 *Chem Phys* **126**:014101. doi:10.1063/1.2408420
- 828 Chen S, McMullan G, Faruqi AR, Murshudov GN, Short JM, Scheres SHW, Henderson R.  
829 2013. High-resolution noise substitution to measure overfitting and validate resolution in  
830 3D structure determination by single particle electron cryomicroscopy. *Ultramicroscopy*  
831 **135**:24–35. doi:10.1016/j.ultramic.2013.06.004
- 832 Clausen JD, Bublitz M, Arnou B, Olesen C, Andersen JP, Møller JV, Nissen P. 2016. Crystal  
833 Structure of the Vanadate-Inhibited Ca<sup>2+</sup>-ATPase. *Structure* **24**:617–623.  
834 doi:10.1016/j.str.2016.02.018
- 835 Damjanovic B, Weber A, Potschies M, Greie J-C, Apell H-J. 2013. Mechanistic Analysis of  
836 the Pump Cycle of the KdpFABC P-Type ATPase. *Biochemistry* **52**:5563–5576.  
837 doi:10.1021/bi400729e
- 838 Diskowski M, Mikusevic V, Stock C, Hänelt I. 2015. Functional diversity of the superfamily  
839 of K<sup>+</sup> transporters to meet various requirements. *Biol Chem*. doi:10.1515/hsz-2015-0123
- 840 Dubey V, Stokes DL, Pedersen BP, Khandelia H. 2021. An Intracellular Pathway Controlled  
841 by the N-terminus of the Pump Subunit Inhibits the Bacterial KdpFABC Ion Pump in  
842 High K<sup>+</sup> Conditions. *J Mol Biol* **433**:167008. doi:10.1016/j.jmb.2021.167008
- 843 Durell SR, Bakker EP, Guy HR. 2000. Does the KdpA subunit from the high affinity K<sup>+</sup>-  
844 translocating P-type Kdp-ATPase have a structure similar to that of K<sup>+</sup> channels?  
845 *Biophys J* **78**:188–99. doi:10.1016/S0006-3495(00)76584-2
- 846 Dyla M, Kjærgaard M, Poulsen H, Nissen P. 2020. Structure and Mechanism of P-Type



- 847 ATPase Ion Pumps. *Annu Rev Biochem* **89**. doi:10.1146/annurev-biochem-010611-  
848 112801
- 849 Emsley P, Cowtan K. 2004. Coot: Model-building tools for molecular graphics. *Acta*  
850 *Crystallogr Sect D Biol Crystallogr* **60**:2126–2132. doi:10.1107/S0907444904019158
- 851 Epstein W, Buurman E, McLaggan D, Naprstek J. 1993. Multiple mechanisms, roles and  
852 controls of K<sup>+</sup> transport in *Escherichia coli*. *Biochemical Society Transactions* pp.  
853 1006–1010. doi:10.1042/bst0211006
- 854 Gaßel M, Möllenkamp T, Puppe W, Altendorf K. 1999. The KdpF subunit is part of the K<sup>+</sup>-  
855 translocating Kdp complex of *Escherichia coli* and is responsible for stabilization of the  
856 complex in vitro. *J Biol Chem* **274**:37901–37907. doi:10.1074/jbc.274.53.37901
- 857 Geertsma ER, Dutzler R. 2011. A versatile and efficient high-throughput cloning tool for  
858 structural biology. *Biochemistry* **50**:3272–3278. doi:10.1021/bi200178z
- 859 Harris CR, Millman KJ, van der Walt SJ, Gommers R, Virtanen P, Cournapeau D, Wieser E,  
860 Taylor J, Berg S, Smith NJ, Kern R, Picus M, Hoyer S, van Kerkwijk MH, Brett M,  
861 Haldane A, del Río JF, Wiebe M, Peterson P, Gérard-Marchant P, Sheppard K, Reddy  
862 T, Weckesser W, Abbasi H, Gohlke C, Oliphant TE. 2020. Array programming with  
863 NumPy. *Nature*. doi:10.1038/s41586-020-2649-2
- 864 Hesse JE, Wieczorek L, Altendorf K, Reicin AS, Dorus E, Epstein W. 1984. Sequence  
865 homology between two membrane transport ATPases, the Kdp-ATPase of *Escherichia*  
866 *coli* and the Ca<sup>2+</sup>-ATPase of sarcoplasmic reticulum. *Proc Natl Acad Sci U S A*  
867 **81**:4746–4750. doi:10.1073/pnas.81.15.4746
- 868 Hiraizumi M, Yamashita K, Nishizawa T, Nureki O. 2019. Cryo-EM structures capture the  
869 transport cycle of the P4-ATPase flippase. *Science* **365**:1149–1155.  
870 doi:10.1126/science.aay3353
- 871 Huang C-S, Panyella Pedersen B, Stokes DL. 2017. Crystal structure of the potassium-  
872 importing KdpFABC membrane complex. *Nature* **546**:681–685.  
873 doi:10.1038/nature22970
- 874 Huang J, Rauscher S, Nawrocki G, Ran T, Feig M, De Groot BL, Grubmüller H, MacKerell  
875 AD. 2016. CHARMM36m: an improved force field for folded and intrinsically  
876 disordered proteins. *Nat Methods* **14**:71–73. doi:10.1038/nmeth.4067
- 877 Humphrey W, Dalke A, Schulten K. 1996. VMD: Visual molecular dynamics. *J Mol Graph*  
878 **14**:33–38. doi:10.1016/0263-7855(96)00018-5
- 879 Hunter JD. 2007. Matplotlib: A 2D graphics environment. *Comput Sci Eng* **9**:90–95.  
880 doi:10.1109/MCSE.2007.55
- 881 Jeschke G. 2018. MMM: A toolbox for integrative structure modeling. *Protein Sci* **27**:76–85.  
882 doi:10.1002/pro.3269
- 883 Jeschke G, Chechik V, Ionita P, Godt A, Zimmermann H, Banham J, Timmel CR, Hilger D,  
884 Jung H. 2006. Applied Magnetic Resonance DeerAnalysis2006 -a Comprehensive  
885 Software Package for Analyzing Pulsed ELDOR Data. *Appl Magn Reson* **30**:473–498.
- 886 Jo S, Kim T, Im W. 2007. Automated Builder and Database of Protein/Membrane Complexes  
887 for Molecular Dynamics Simulations. *PLoS One* **2**:e880.  
888 doi:10.1371/journal.pone.0000880
- 889 Lee J, Cheng X, Swails JM, Yeom MS, Eastman PK, Lemkul JA, Wei S, Buckner J, Jeong  
890 JC, Qi Y, Jo S, Pande VS, Case DA, Brooks CL, MacKerell AD, Klauda JB, Im W.

- 891 2016. CHARMM-GUI Input Generator for NAMD, GROMACS, AMBER, OpenMM,  
892 and CHARMM/OpenMM Simulations Using the CHARMM36 Additive Force Field. *J*  
893 *Chem Theory Comput* **12**:405–413. doi:10.1021/acs.jctc.5b00935
- 894 Liebschner D, Afonine P V., Baker ML, Bunkoczi G, Chen VB, Croll TI, Hintze B, Hung  
895 LW, Jain S, McCoy AJ, Moriarty NW, Oeffner RD, Poon BK, Prisant MG, Read RJ,  
896 Richardson JS, Richardson DC, Sammito MD, Sobolev O V., Stockwell DH, Terwilliger  
897 TC, Urzhumtsev AG, Videau LL, Williams CJ, Adams PD. 2019. Macromolecular  
898 structure determination using X-rays, neutrons and electrons: Recent developments in  
899 Phenix. *Acta Crystallogr Sect D Struct Biol* **75**:861–877.  
900 doi:10.1107/S2059798319011471
- 901 Mastrorarde DN. 2005. Automated electron microscope tomography using robust prediction  
902 of specimen movements. *J Struct Biol* **152**:36–51. doi:10.1016/j.jsb.2005.07.007
- 903 Michaud-Agrawal N, Denning EJ, Woolf TB, Beckstein O. 2011. MDAAnalysis: A toolkit for  
904 the analysis of molecular dynamics simulations. *J Comput Chem* **32**:2319–2327.  
905 doi:10.1002/jcc.21787
- 906 Morin A, Eisenbraun B, Key J, Sanschagrin PC, Timony MA, Ottaviano M, Sliz P. 2013.  
907 Collaboration gets the most out of software. *eLife* **2**:e01456. doi:10.7554/eLife.01456
- 908 Pannier M, Veit S, Godt A, Jeschke G, Spiess HW. 2011. Dead-time free measurement of  
909 dipole–dipole interactions between electron spins. *J Magn Reson* **213**:316–325.  
910 doi:10.1016/j.jmr.2011.08.035
- 911 Parrinello M, Rahman A. 1981. Polymorphic transitions in single crystals: A new molecular  
912 dynamics method. *J Appl Phys* **52**:7182–7190. doi:10.1063/1.328693
- 913 Pedersen BP, Stokes DL, Apell HJ. 2019. The KdpFABC complex–K<sup>+</sup> transport against all  
914 odds. *Mol Membr Biol*. doi:10.1080/09687688.2019.1638977
- 915 Pettersen EF, Goddard TD, Huang CC, Couch GS, Greenblatt DM, Meng EC, Ferrin TE.  
916 2004. UCSF Chimera - A visualization system for exploratory research and analysis. *J*  
917 *Comput Chem* **25**:1605–1612. doi:10.1002/jcc.20084
- 918 Pettersen EF, Goddard TD, Huang CC, Meng EC, Couch GS, Croll TI, Morris JH, Ferrin TE.  
919 2021. UCSF ChimeraX: Structure visualization for researchers, educators, and  
920 developers. *Protein Sci* **30**:70–82. doi:10.1002/pro.3943
- 921 Polarek JW, Williams G, Epstein W. 1992. The products of the *kdpDE* operon are required  
922 for expression of the Kdp ATPase of *Escherichia coli*. *J Bacteriol* **174**:2145–2151.  
923 doi:10.1128/jb.174.7.2145-2151.1992
- 924 Polyhach Y, Bordignon E, Jeschke G. 2010. Rotamer libraries of spin labelled cysteines for  
925 protein studies. *Phys Chem Chem Phys* **13**:2356–2366. doi:10.1039/c0cp01865a
- 926 Post RL, Hegyvary C, Kume S. 1972. Activation by adenosine triphosphate in the  
927 phosphorylation kinetics of sodium and potassium ion transport adenosine  
928 triphosphatase. *J Biol Chem* **247**:6530–6540.
- 929 Punjani A, Rubinstein JL, Fleet DJ, Brubaker MA. 2017. CryoSPARC: Algorithms for rapid  
930 unsupervised cryo-EM structure determination. *Nat Methods* **14**:290–296.  
931 doi:10.1038/nmeth.4169
- 932 Rheinberger J, Oostergetel G, Resch GP, Paulino C. 2021. Optimized cryo-EM data-  
933 acquisition workflow by sample-thickness determination. *Acta Crystallogr Sect D Struct*  
934 *Biol* **77**:565–571. doi:10.1107/S205979832100334X

- 935 Rhoads DB, Epstein W. 1977. Energy coupling to Net K<sup>+</sup> transport in *Escherichia coli* K 12.  
936 *J Biol Chem* **252**:1394–1401. doi:10.1016/s0021-9258(17)40669-7
- 937 Roe AJ, McLaggan D, O’Byrne CP, Booth IR. 2000. Rapid inactivation of the *Escherichia*  
938 *coli* Kdp K<sup>+</sup> uptake system by high potassium concentrations. *Mol Microbiol* **35**:1235–  
939 1243. doi:10.1046/J.1365-2958.2000.01793.X
- 940 Rohou A, Grigorieff N. 2015. CTFFIND4: Fast and accurate defocus estimation from  
941 electron micrographs. *J Struct Biol* **192**:216–221. doi:10.1016/j.jsb.2015.08.008
- 942 Rosenthal PB, Henderson R. 2003. Optimal determination of particle orientation, absolute  
943 hand, and contrast loss in single-particle electron cryomicroscopy. *J Mol Biol* **333**:721–  
944 745. doi:10.1016/j.jmb.2003.07.013
- 945 Schniederberend M, Zimmann P, Bogdanov M, Dowhan W, Altendorf K. 2010. Influence of  
946 K<sup>+</sup>-dependent membrane lipid composition on the expression of the *kdpFABC* operon in  
947 *Escherichia coli*. *Biochim Biophys Acta - Biomembr* **1798**:32–39.  
948 doi:10.1016/j.bbamem.2009.10.002
- 949 Schorb M, Haberbosch I, Hagen WJH, Schwab Y, Mastronarde DN. 2019. Software tools for  
950 automated transmission electron microscopy. *Nat Methods* **16**:471–477.  
951 doi:10.1038/s41592-019-0396-9
- 952 Silberberg JM, Corey RA, Hielkema L, Stock C, Stansfeld PJ, Paulino C, Hänel I. 2021.  
953 Deciphering ion transport and ATPase coupling in the intersubunit tunnel of KdpFABC.  
954 *Nat Commun* **12**. doi:10.1038/S41467-021-25242-X
- 955 Sørensen TLM, Møller JV, Nissen P. 2004. Phosphoryl transfer and calcium ion occlusion in  
956 the calcium pump. *Science* **304**:1672–1675. doi:10.1126/science.1099366
- 957 Stautz J, Hellmich Y, Fuss MF, Silberberg JM, Devlin JR, Stockbridge RB, Hänel I. 2021.  
958 Molecular mechanisms for bacterial potassium homeostasis. *J Mol Biol* 166968.  
959 doi:10.1016/j.jmb.2021.166968
- 960 Stock C, Hielkema L, Tascón I, Wunnicke D, Oostergetel GT, Azkargorta M, Paulino C,  
961 Hänel I. 2018. Cryo-EM structures of KdpFABC suggest a K<sup>+</sup> transport mechanism via  
962 two inter-subunit half-channels. *Nat Commun* **9**:4971. doi:10.1038/s41467-018-07319-2
- 963 Sweet ME, Larsen C, Zhang X, Schlame M, Pedersen BP, Stokes DL. 2021. Structural basis  
964 for potassium transport in prokaryotes by KdpFABC. *Proc Natl Acad Sci* **118**.
- 965 Sweet ME, Zhang X, Erdjument-Bromage H, Dubey V, Khandelvia H, Neubert TA, Pedersen  
966 BP, Stokes DL. 2020. Serine phosphorylation regulates the P-type potassium pump  
967 KdpFABC. *eLife* **9**:e55480. doi:10.7554/eLife.55480
- 968 Toyoshima C, Nakasako M, Nomura H, Ogawa H. 2000. Crystal structure of the calcium  
969 pump of sarcoplasmic reticulum at 2.6 Å resolution. *Nature* **405**:647–655.  
970 doi:10.1038/35015017
- 971 Veshaguri S, Christensen SM, Kemmer GC, Ghale G, Møller MP, Lohr C, Christensen AL,  
972 Justesen BH, Jørgensen IL, Schiller J, Hatzakis NS, Grabe M, Günther Pomorski T,  
973 Stamou D. 2016. Direct observation of proton pumping by a eukaryotic P-type ATPase.  
974 *Science* **351**:1469–1473. doi:10.1126/science.aad6429
- 975 Wagner T, Merino F, Stabrin M, Moriya T, Antoni C, Apelbaum A, Hagel P, Sitsel O, Raisch  
976 T, Prumbaum D, Quentin D, Roderer D, Tacke S, Siebolds B, Schubert E, Shaikh TR,  
977 Lill P, Gatsogiannis C, Raunser S. 2019. SPHIRE-crYOLO is a fast and accurate fully  
978 automated particle picker for cryo-EM. *Commun Biol* **2**. doi:10.1038/s42003-019-0437-

979 z

980 Williams CJ, Headd JJ, Moriarty NW, Prisant MG, Videau LL, Deis LN, Verma V, Keedy  
981 DA, Hintze BJ, Chen VB, Jain S, Lewis SM, Arendall WB, Snoeyink J, Adams PD,  
982 Lovell SC, Richardson JS, Richardson DC. 2018. MolProbity: More and better reference  
983 data for improved all-atom structure validation. *Protein Sci* **27**:293–315.  
984 doi:10.1002/pro.3330

985 Zheng SQ, Palovcak E, Armache JP, Verba KA, Cheng Y, Agard DA. 2017. MotionCor2:  
986 Anisotropic correction of beam-induced motion for improved cryo-electron microscopy.  
987 *Nat Methods*. doi:10.1038/nmeth.4193

988 Zivanov J, Nakane T, Forsberg BO, Kimanius D, Hagen WJH, Lindahl E, Scheres SHW.  
989 2018. New tools for automated high-resolution cryo-EM structure determination in  
990 RELION-3. *eLife* **7**:e42166. doi:10.7554/eLife.42166

991

## 992 Supplementary Data

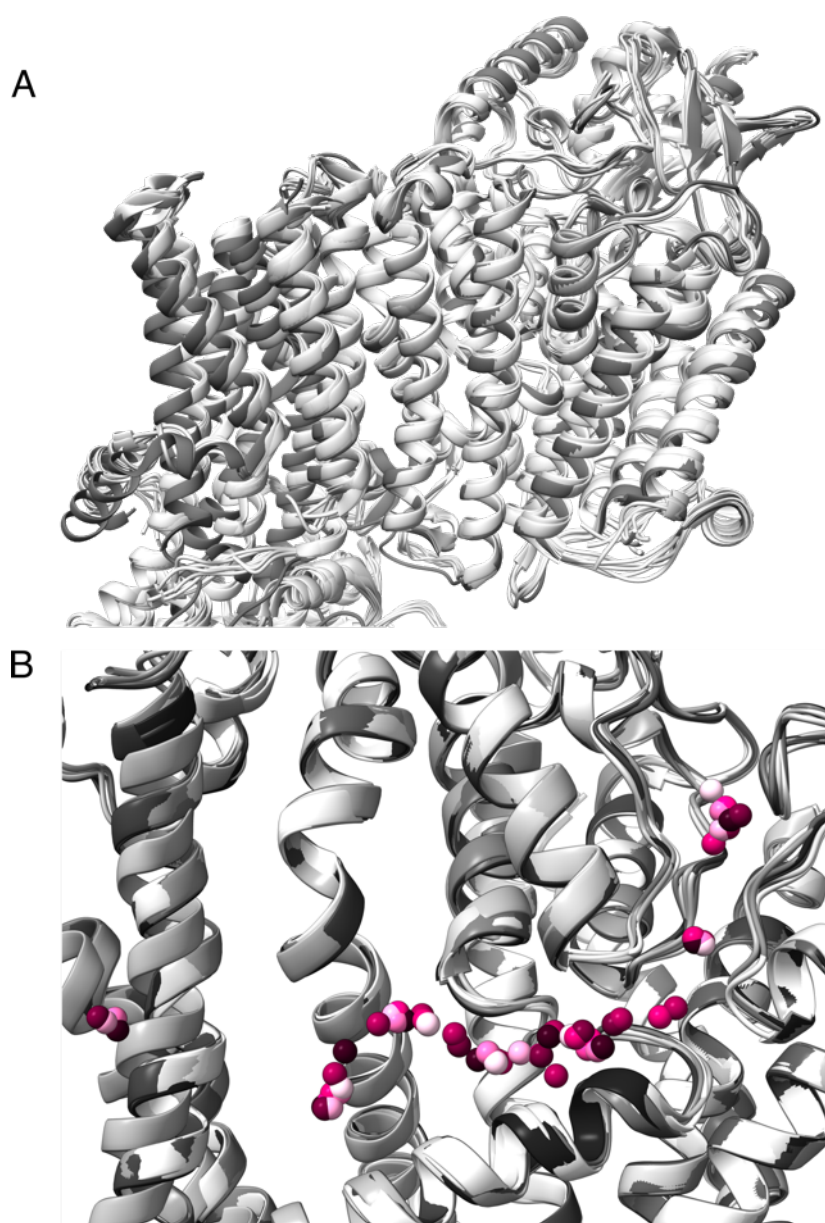

993  
994 **Table 1 – Figure Supplement 1: Comparison of TMDs of all KdpFABC structures obtained in this study.**  
995 A Superimposition of all KdpFABC structures obtained in this study on KdpA, showing few significant deviations  
996 in the TMD or KdpC. All E1 conformations shaded in light gray, all E2 conformations in dark gray.  
997 B Superimposition of all potential potassium ions in the intersubunit tunnel found in all structures presented in  
998 this paper. Ions for each structure are presented in a different pink shade.

Table 1 – Table Supplement 1: Cryo-EM data collection, refinement, and validation statistics

|                                                     | KdpFABC<br>E1-ATP <sub>early</sub> | KdpFABC<br>E1-P-ADP                | KdpFABC<br>E1-P tight | KdpFABC<br>E1-P tight<br>(VO <sub>4</sub> <sup>3-</sup> ) | KdpFABC<br>E2-P<br>(VO <sub>4</sub> <sup>3-</sup> ) | KdpFAB <sub>S162A</sub> C<br>E1-P-ADP | KdpFAB <sub>S162A</sub> C<br>E2-P | KdpFAB <sub>D307N</sub> C<br>E1 apo tight | KdpFAB <sub>D307N</sub> C<br>E1 apo open 1 | KdpFAB <sub>D307N</sub> C<br>E1 apo open 2 |
|-----------------------------------------------------|------------------------------------|------------------------------------|-----------------------|-----------------------------------------------------------|-----------------------------------------------------|---------------------------------------|-----------------------------------|-------------------------------------------|--------------------------------------------|--------------------------------------------|
|                                                     | EMD-14913<br>[7ZRG]                | EMD-14917<br>[7ZRK]                | EMD-14912<br>[7ZRE]   | EMD-14911<br>[7ZRD]                                       | EMD-14347                                           | EMD-14919<br>[7ZRM]                   | EMD-14918<br>[7ZRL]               | EMD-14914<br>[7ZRH]                       | EMD-14915<br>[7ZRI]                        | EMD-14916<br>[7ZRJ]                        |
| <b>Data collection and processing</b>               |                                    |                                    |                       |                                                           |                                                     |                                       |                                   |                                           |                                            |                                            |
| Magnification                                       | 49,407                             | 49,407                             | 49,407                | 49,407                                                    | 49,407                                              | 49,407                                | 49,407                            | 49,407                                    | 49,407                                     | 49,407                                     |
| Voltage (keV)                                       | 200                                | 200                                | 200                   | 200                                                       | 200                                                 | 200                                   | 200                               | 200                                       | 200                                        | 200                                        |
| Electron exposure (e <sup>-</sup> /Å <sup>2</sup> ) | 52                                 | 52                                 | 52                    | 52                                                        | 52                                                  | 52                                    | 52                                | 52                                        | 52                                         | 52                                         |
| Defocus range (µm)                                  | -0.5 to -2.0                       | -0.5 to -2.0                       | -0.5 to -2.0          | -0.5 to -2.0                                              | -0.5 to -2.0                                        | -0.5 to -2.0                          | -0.5 to -2.0                      | -0.5 to -2.0                              | -0.5 to -2.0                               | -0.5 to -2.0                               |
| Pixel size (Å)                                      | 1.012                              | 1.012                              | 1.012                 | 1.012                                                     | 1.012                                               | 1.012                                 | 1.012                             | 1.012                                     | 1.012                                      | 1.012                                      |
| Symmetry imposed                                    | C1                                 | C1                                 | C1                    | C1                                                        | C1                                                  | C1                                    | C1                                | C1                                        | C1                                         | C1                                         |
| Initial particle images (no.)                       | 1,128,433                          | 1,128,433                          | 1,128,433             | 164,891                                                   | 164,891                                             | 287,232                               | 287,232                           | 728,674                                   | 728,674                                    | 728,674                                    |
| Final particle images (no.)                         | 76,121                             | 257,675                            | 114,488               | 74,927                                                    | 13,508                                              | 58,243                                | 46,904                            | 88,852                                    | 75,711                                     | 47,981                                     |
| Map resolution (Å)                                  | 3.5                                | 3.1                                | 3.4                   | 3.3                                                       | 7.4                                                 | 3.7                                   | 4.0                               | 3.4                                       | 3.5                                        | 3.7                                        |
| FSC threshold                                       | 0.143                              | 0.143                              | 0.143                 | 0.143                                                     | 0.143                                               | 0.143                                 | 0.143                             | 0.143                                     | 0.143                                      | 0.143                                      |
| Map resolution range (Å)                            | 3.3-6.5                            | 3.0-5.5                            | 3.1-5.0               | 3.1-5.0                                                   | N/A                                                 | 3.5-6.5                               | 3.8-7.0                           | 3.3-5.5                                   | 3.4-6.5                                    | 3.6-6.5                                    |
| <b>Refinement</b>                                   |                                    |                                    |                       |                                                           |                                                     |                                       |                                   |                                           |                                            |                                            |
| Initial model used (PDB code)                       | 7NNL                               | 7NNL                               | 6HRA                  | 6HRA                                                      | N/A                                                 | 7NNL                                  | 6HRB                              | 6HRA                                      | 6HRA                                       | 6HRA                                       |
| Model resolution (Å)                                | 3.7                                | 3.6                                | 3.6                   | 3.5                                                       | N/A                                                 | 4.0                                   | 4.1                               | 3.5                                       | 3.6                                        | 3.7                                        |
| FSC threshold                                       | 0.5                                | 0.5                                | 0.5                   | 0.5                                                       | N/A                                                 | 0.5                                   | 0.5                               | 0.5                                       | 0.5                                        | 0.5                                        |
| Model resolution range (Å)                          | 80-3.5                             | 80-3.1                             | 80-3.4                | 80-3.3                                                    | N/A                                                 | 80-3.7                                | 80-4.0                            | 80-3.4                                    | 80-3.5                                     | 80-3.7                                     |
| Sharpening B-factor (Å <sup>2</sup> )               | -132                               | -122                               | -134                  | -55                                                       | -195                                                | -123                                  | -160                              | -113                                      | -117                                       | -119                                       |
| <b>Model composition</b>                            |                                    |                                    |                       |                                                           |                                                     |                                       |                                   |                                           |                                            |                                            |
| Non-hydrogen atoms                                  | 11097                              | 11103                              | 11071                 | 11072                                                     | N/A                                                 | 10890                                 | 10782                             | 11065                                     | 11065                                      | 11065                                      |
| Protein residues                                    | 1456                               | 1456                               | 1456                  | 1456                                                      | N/A                                                 | 1456                                  | 1456                              | 1456                                      | 1456                                       | 1456                                       |
| Ligands                                             | K: 7<br>CDL: 2<br>ATP: 1           | K: 13<br>CDL: 2<br>ADP: 1<br>MG: 1 | K: 9<br>CDL: 2        | K: 9<br>CDL: 2<br>VO4: 1                                  | N/A                                                 | K: 5<br>ADP: 1<br>MG: 1               | K: 1                              | K: 7<br>CDL: 2                            | K: 7<br>CDL: 2                             | K: 7<br>CDL: 2                             |
| <b>B factors (Å<sup>2</sup>)</b>                    |                                    |                                    |                       |                                                           |                                                     |                                       |                                   |                                           |                                            |                                            |
| Protein                                             | 55.0                               | 54.3                               | 50.2                  | 23.8                                                      | N/A                                                 | 54.8                                  | 69.9                              | 33.0                                      | 52.5                                       | 47.5                                       |
| Ligand                                              | 54.8                               | 55.6                               | 40.1                  | 25.9                                                      | N/A                                                 | 116.6                                 | 64.4                              | 29.6                                      | 49.5                                       | 37.8                                       |
| <b>R.m.s. deviations</b>                            |                                    |                                    |                       |                                                           |                                                     |                                       |                                   |                                           |                                            |                                            |
| Bond lengths (Å)                                    | 0.006                              | 0.006                              | 0.007                 | 0.006                                                     | N/A                                                 | 0.004                                 | 0.005                             | 0.004                                     | 0.004                                      | 0.005                                      |
| Bond angles (°)                                     | 0.849                              | 0.877                              | 0.976                 | 0.893                                                     | N/A                                                 | 0.838                                 | 0.908                             | 0.828                                     | 0.820                                      | 0.908                                      |
| <b>Validation</b>                                   |                                    |                                    |                       |                                                           |                                                     |                                       |                                   |                                           |                                            |                                            |
| MolProbity Score                                    | 1.74                               | 1.72                               | 1.70                  | 1.53                                                      | N/A                                                 | 1.68                                  | 1.77                              | 1.73                                      | 1.68                                       | 1.80                                       |
| Clash score                                         | 7.24                               | 8.04                               | 7.79                  | 5.88                                                      | N/A                                                 | 6.82                                  | 8.17                              | 7.43                                      | 6.90                                       | 9.34                                       |
| Poor rotamers, %                                    | 0.00                               | 0.00                               | 0.00                  | 0.00                                                      | N/A                                                 | 0.00                                  | 0.00                              | 0.00                                      | 0.00                                       | 0.00                                       |
| <b>Ramachandran plot</b>                            |                                    |                                    |                       |                                                           |                                                     |                                       |                                   |                                           |                                            |                                            |
| Favored (%)                                         | 95.02                              | 95.91                              | 95.98                 | 96.68                                                     | N/A                                                 | 95.64                                 | 95.26                             | 94.43                                     | 95.71                                      | 95.64                                      |
| Allowed (%)                                         | 4.98                               | 4.09                               | 4.02                  | 3.32                                                      | N/A                                                 | 4.36                                  | 4.74                              | 4.57                                      | 4.29                                       | 4.36                                       |
| Outliers (%)                                        | 0.00                               | 0.00                               | 0.00                  | 0.00                                                      | N/A                                                 | 0.00                                  | 0.00                              | 0.00                                      | 0.00                                       | 0.00                                       |

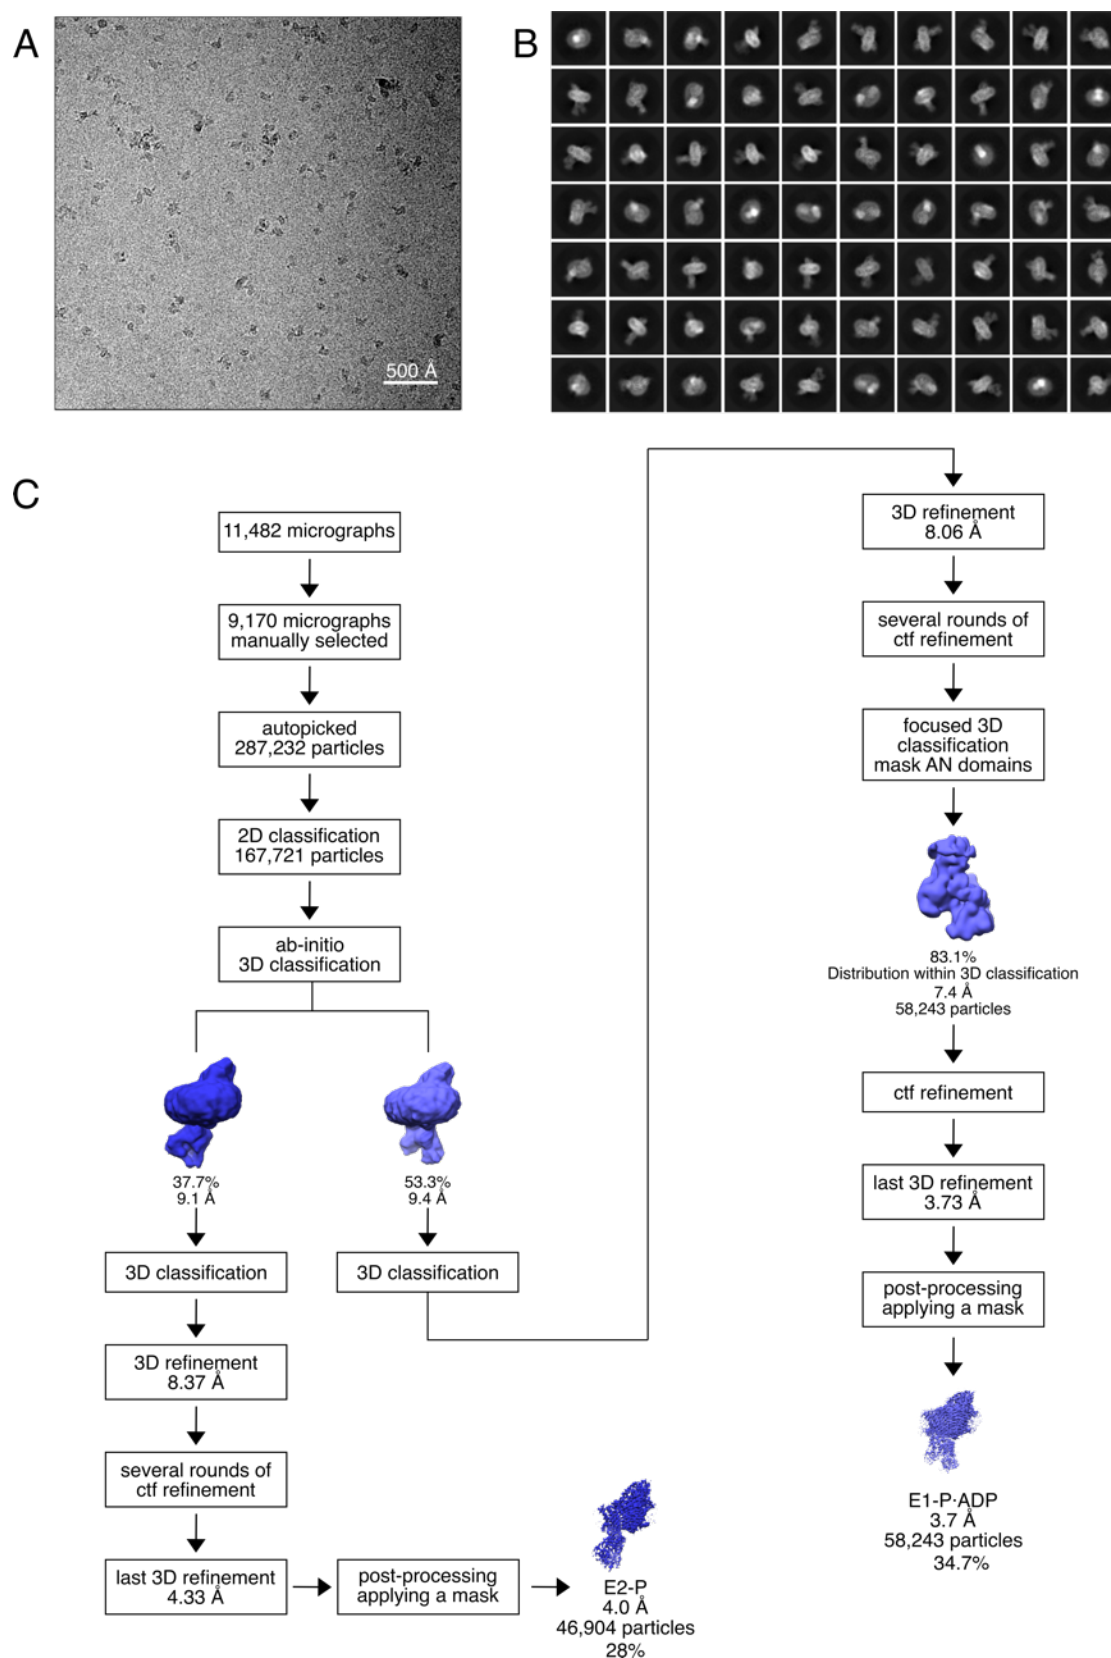

1001  
1002  
1003  
1004  
1005  
1006

**Figure 1 – Figure Supplement 1: Cryo-EM analysis of the KdpFABS<sub>162A</sub>C complex under turnover conditions, resulting in E1-P·ADP and E2-P states.** **A** Representative cryo-EM image of the recorded data and **B** 2D class averages of vitrified WT KdpFABS<sub>162-P</sub>C in the presence of 2 mM ATP and 50 mM KCl. **C** Image processing workflow as described in the material and methods. If not otherwise noted, indicated class percentages refer to the initial set of particles defined after 2D classification.

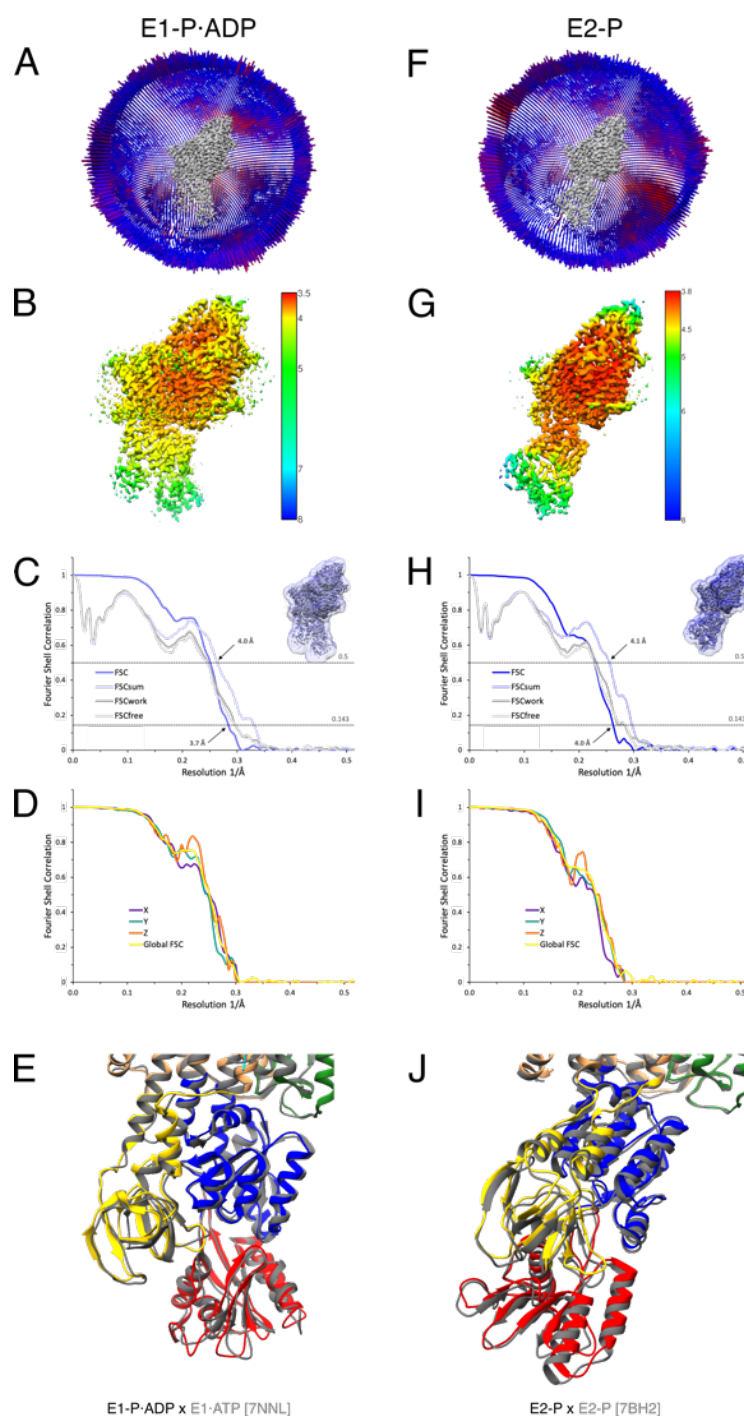

1007  
 1008 **Figure 1 – Figure Supplement 2: Cryo-EM validation of KdpFAB<sub>S162A</sub>C under turnover conditions.**  
 1009 Validation shown for the E1-P·ADP (A-E) and the E2-P state (F-J). A,F Angular distribution plots of particles  
 1010 included in the final unsymmetrized 3D reconstruction. The number of particles with the respective orientations  
 1011 is represented by length and color of the cylinders (long and red: high number of particles; short and blue: low  
 1012 number of particles). B,G Final reconstruction maps colored by local resolution as estimated by RELION. C,H  
 1013 FSC plots for resolution estimation and model validation. The gold-standard FSC plot between two  
 1014 separately refined half-maps is shown in dark blue and indicates final resolutions of 3.7 Å and 4.0 Å for the E1-  
 1015 P·ADP state (C) and the E2-P state (H), respectively. The FSC model validation curves for FSCsum, FSCwork  
 1016 and FSCfree are described in material and methods and show no overfitting. Thumbnails of the mask used for  
 1017 FSC calculation overlaid on the maps are shown in the upper right corner of both curves. Dashed lines indicate  
 1018 the FSC thresholds used for FSC (0.143) and for FSCsum (0.5). D,I Anisotropy estimation plots of the final maps  
 1019 show no significant anisotropy. E,J Superposition of the E1-P·ADP conformation (colored) with the AMPPCP-  
 1020 stabilized E1·ATP structure [7NNL] (gray), and the E2-P conformation (colored) with the BeF<sub>3</sub><sup>-</sup>-stabilized E2-P  
 1021 structure [7BH2] (gray), respectively, verifying the assignment of each structure at its position in the  
 1022 conformational cycle.



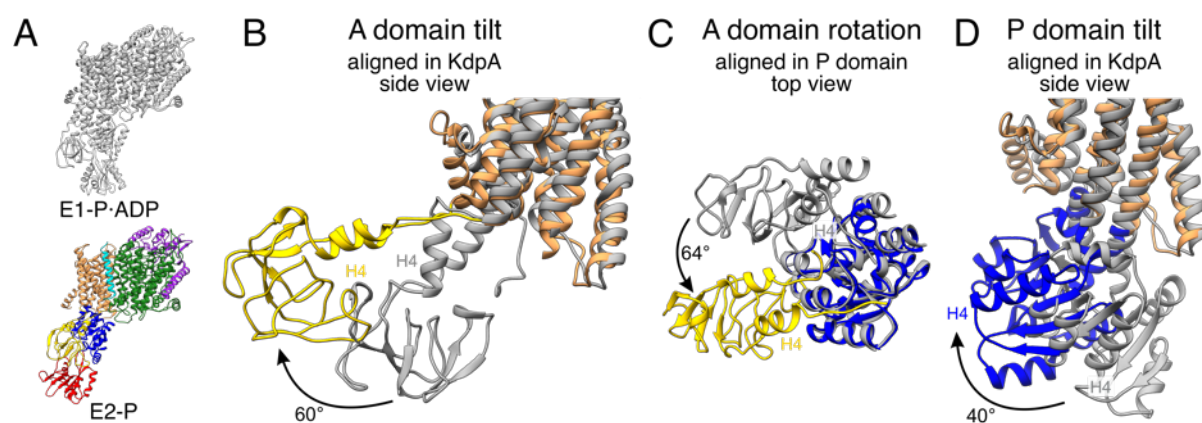

1023  
1024  
1025  
1026  
1027  
1028  
1029  
1030  
1031

**Figure 1 – Figure Supplement 3: A and P domain movements during the E1-P/E2-P transition.**  
A KdpFAB<sub>S162A</sub>C structures in the E1-P·ADP (colors) and E2-P (gray) states. Individual panels show (B) the tilt of the A domain (structures aligned on the static KdpA, N and P domain removed for clarity), (C) the rotation of the A domain around the P domain (structures aligned on the P domain, N domain and the TMD removed for clarity), and (D) the tilt of the P domain (structures aligned on the static KdpA, A and N domain removed for clarity). In the E1-P/E2-P transition, the A domain tilts by 60°, while the P domain tilts by 40°. Additionally, the A domain rotates by 64° around the P domain. Helices from the A and P domains used for angle measurements are labelled in all panels.

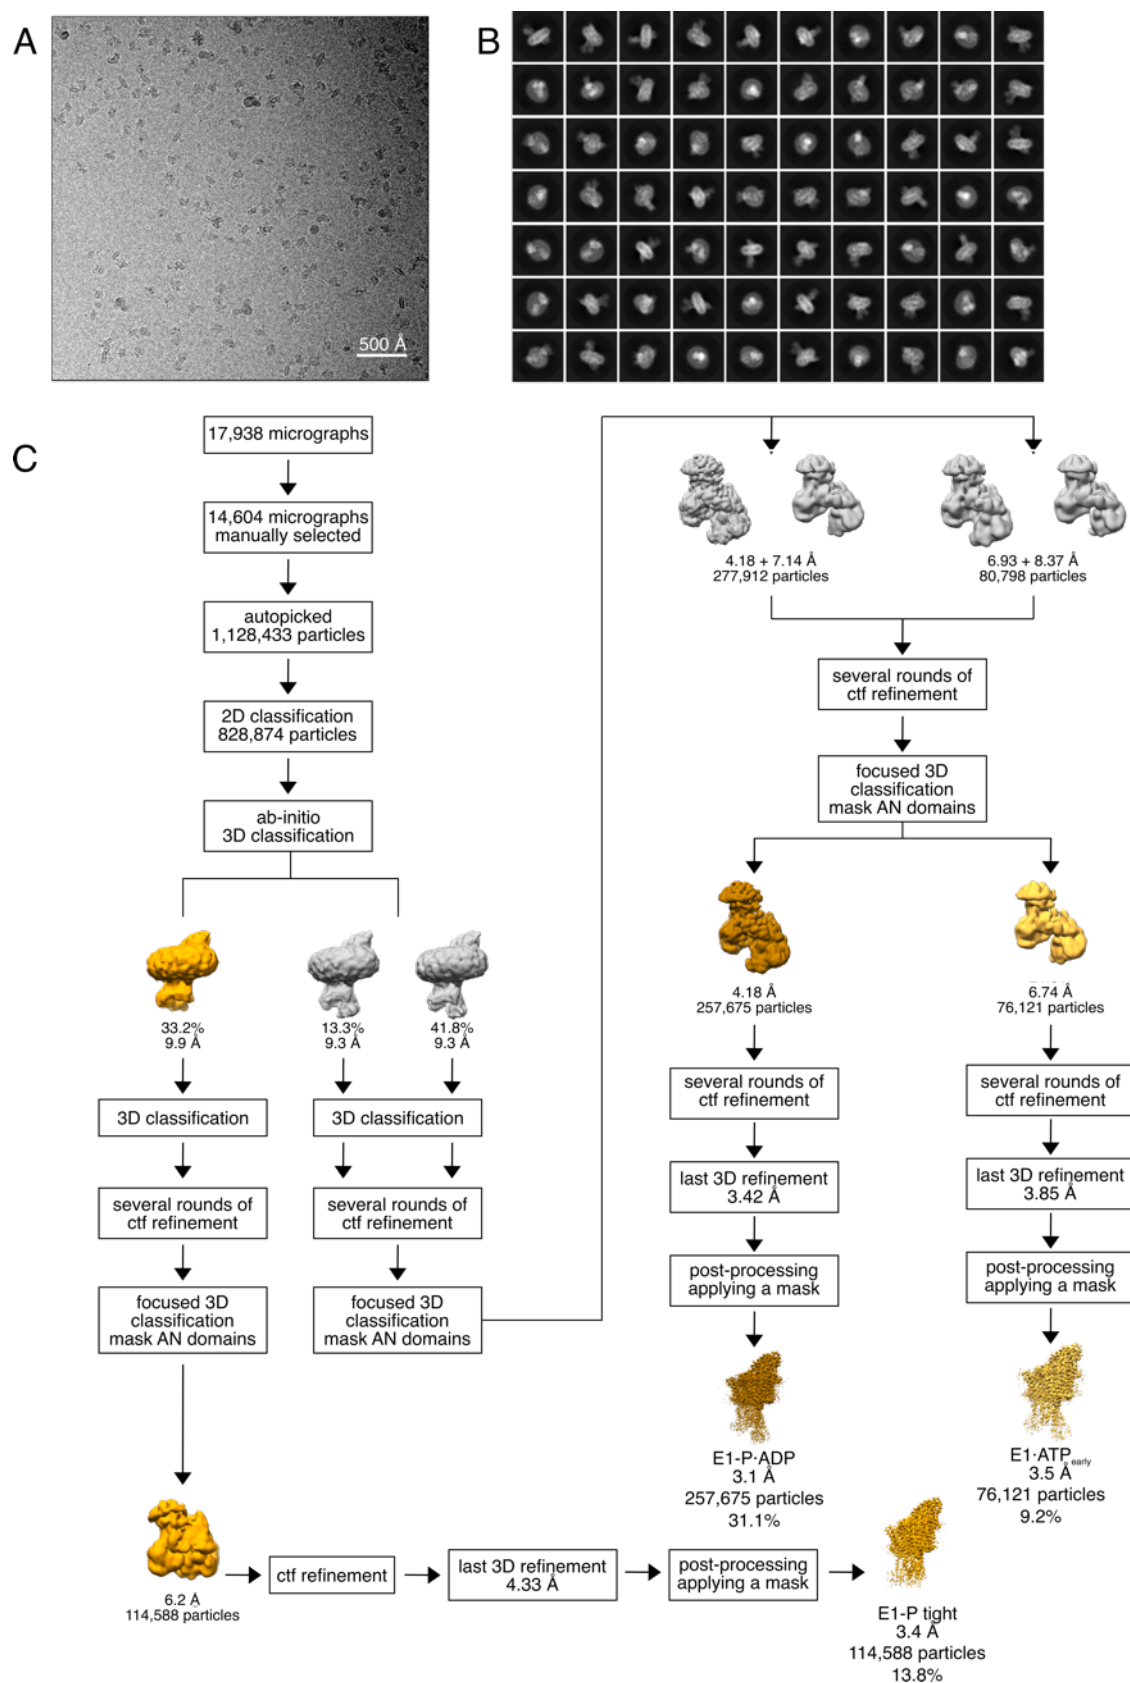

1032  
1033  
1034  
1035  
1036  
1037

**Figure 2 – Figure Supplement 1: Cryo-EM analysis of the WT KdpFAB<sub>S162-P</sub>C complex under turnover conditions, resulting in the E1-P tight, E1-P·ADP and E1·ATP<sub>early</sub> states. A** Representative cryo-EM image of the recorded data and **B** 2D class averages of vitrified WT KdpFAB<sub>S162-P</sub>C in the presence of 2 mM ATP and 50 mM KCl. **C** Image processing workflow as described in the material and methods. Indicated class percentages refer to the initial set of particles defined after 2D classification.

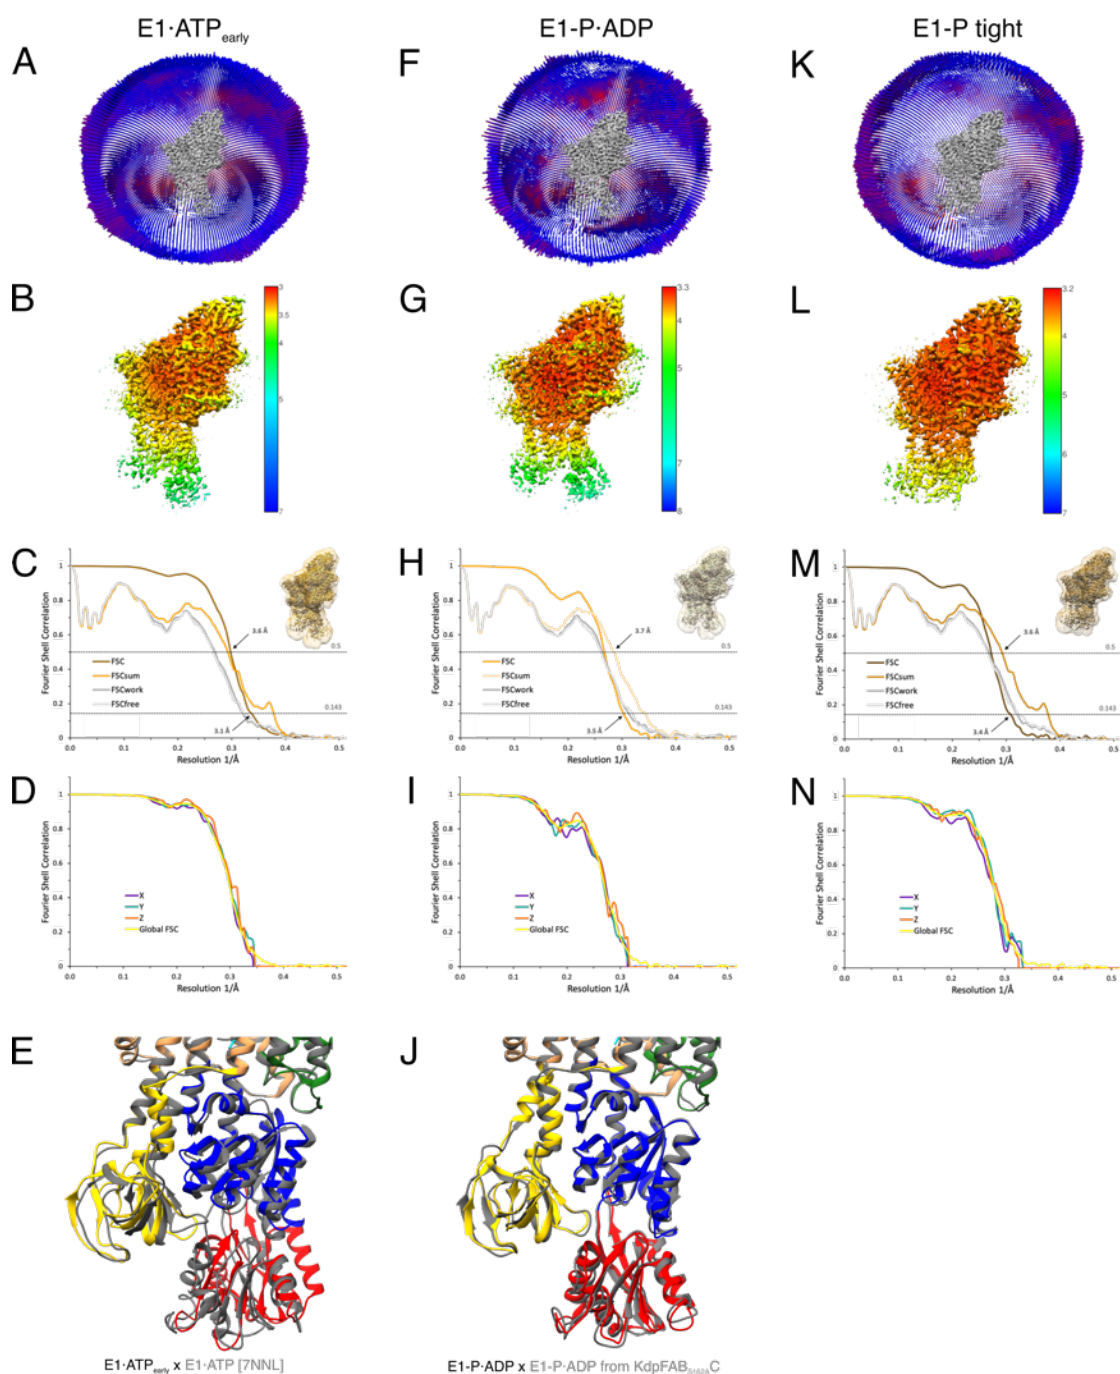

E1-ATP<sub>early</sub> x E1-ATP [7NNL]

E1-P-ADP x E1-P-ADP from KdpFAB<sub>S162A</sub>C

1038  
1039  
1040  
1041  
1042  
1043  
1044  
1045  
1046  
1047  
1048  
1049  
1050  
1051  
1052  
1053  
1054

**Figure 2 – Figure Supplement 2: Cryo-EM validation of WT KdpFAB<sub>S162-P</sub>C under turnover.** Validation shown for the E1·ATP<sub>early</sub> state (A-E), the E1-P·ADP state (F-J), and the E1-P tight state (K-N). A,F,K Angular distribution plots of particles included in the final unsymmetrized 3D reconstruction. The number of particles with the respective orientations is represented by length and color of the cylinders (long and red: high number of particles; short and blue: low number of particles). B,G,L Final reconstruction maps colored by local resolution as estimated by RELION. C,H,M FSC plots used for resolution estimation and model validation. The gold-standard FSC plot between two separately refined half-maps indicates final resolutions of 3.5 Å for the E1·ATP<sub>early</sub> state (C), 3.1 Å for the E1-P·ADP state (H) and 3.4 Å for the E1-P tight state (M). The FSC model validation curves for FSCsum, FSCwork and FSCfree are described in material and methods and show no overfitting. Thumbnails of the masks used for FSC calculation overlaid on the maps are shown in the upper right corner of the curves. Dashed lines indicate the FSC thresholds used for FSC (0.143) and for FSCsum (0.5). D,I,N Anisotropy estimation plots of the final maps show no significant anisotropy. E Superposition of the E1·ATP<sub>early</sub> structure (colored) with the AMPPCP-stabilized E1·ATP structure [7NNL] (gray), showing a slightly more open N domain in the structure obtained under turnover conditions. J Superposition of the E1-P·ADP structure (colored) with the same conformation obtained from KdpFAB<sub>S162A</sub>C under turnover conditions (gray), showing the conformational identity.

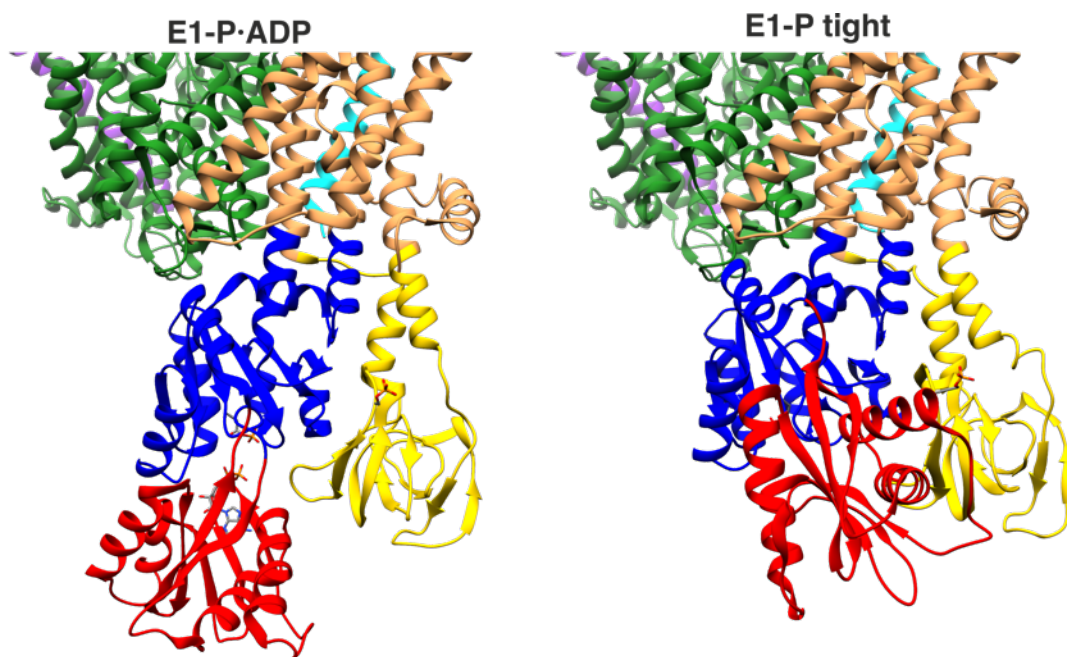

1055  
1056  
1057  
1058

**Figure 2 – Figure Supplement 3: Proximity of A and N domains in E1-P·ADP and E1-P tight KdpFABC.** In the E1-P tight state, the interface of the N and A domains is significantly increased compared to the low proximity observed in the E1-P·ADP state.

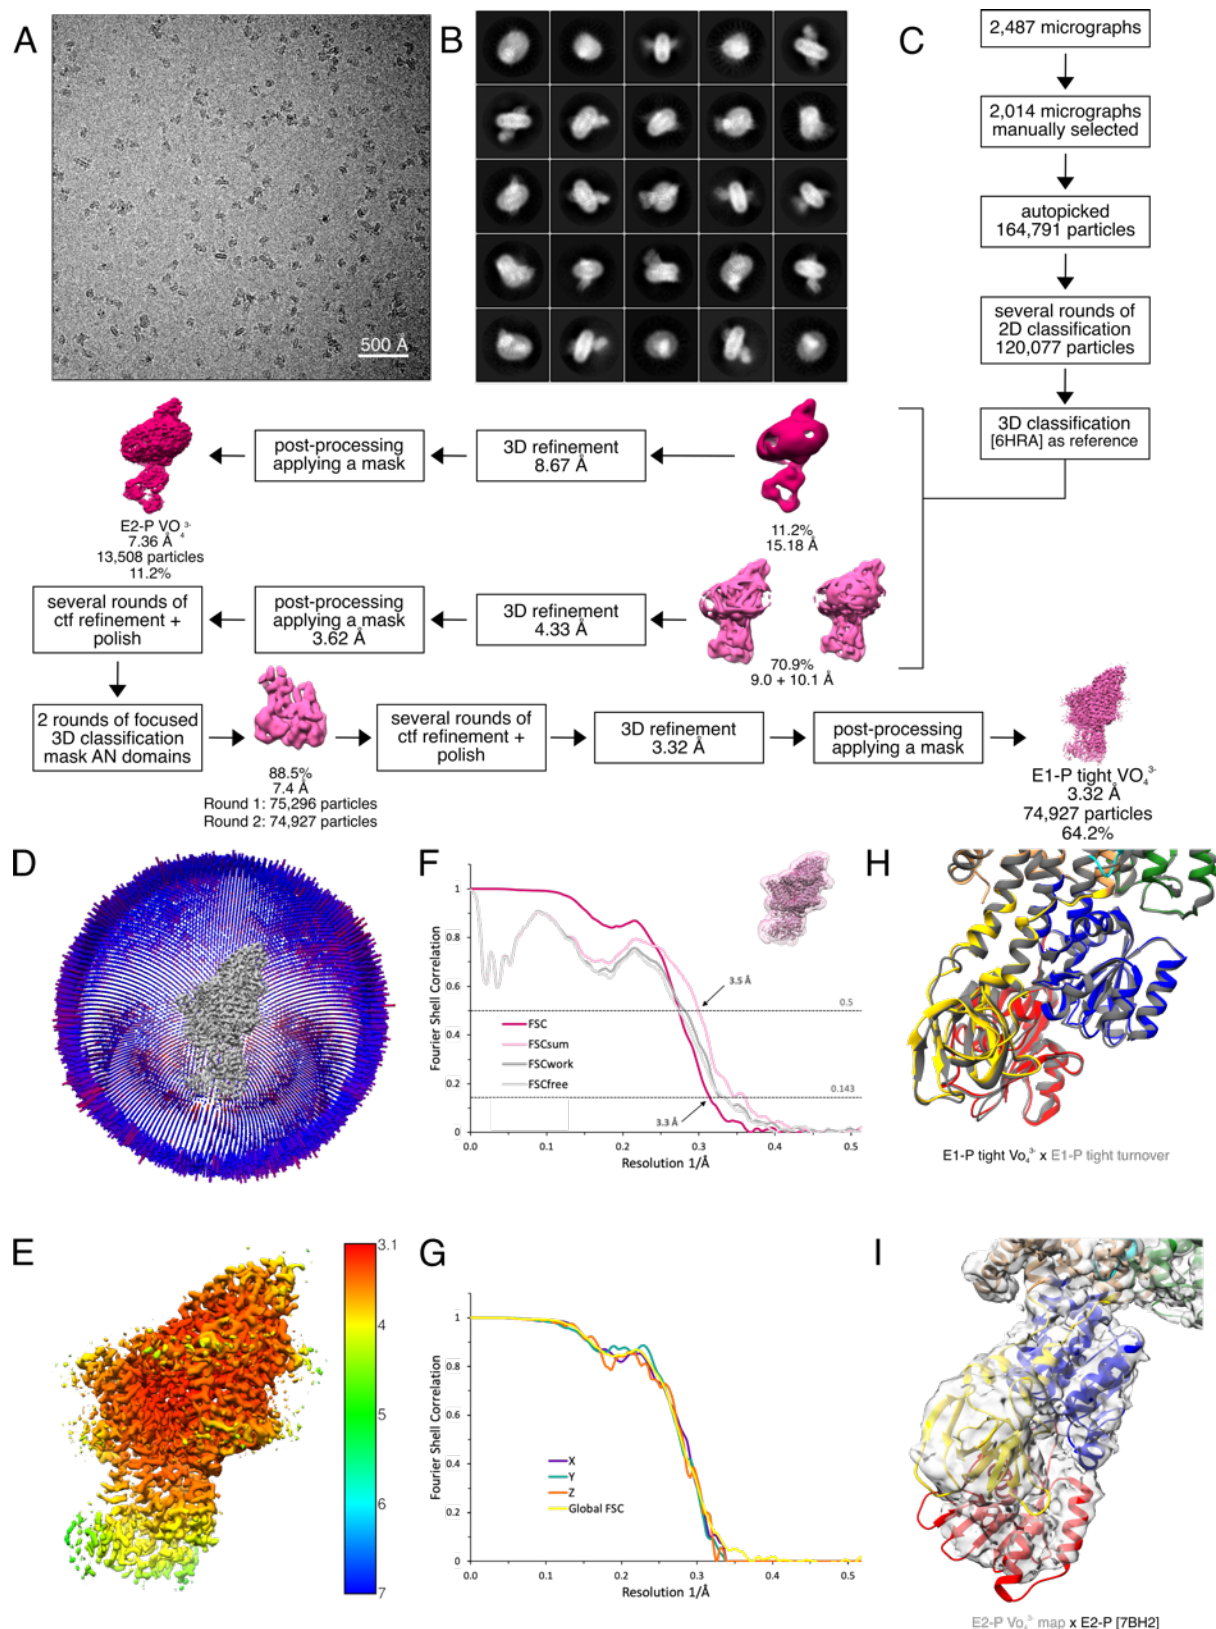

1059  
1060  
1061  
1062  
1063  
1064  
1065  
1066

**Figure 2 – Figure Supplement 4: Cryo-EM analysis of WT KdpFAB<sub>S162</sub>-PC in the presence of orthovanadate, resulting in the E1-P tight and E2-P state.** **A** Representative cryo-EM image of the recorded data. **B** 2D class averages of vitrified WT KdpFAB<sub>S162</sub>-PC in the presence of orthovanadate. **C** Image processing workflow as described in the material and methods section. Indicated class percentages refer to the initial set of particles defined after 2D classification. **D** Angular distribution plot of particles included in the unsymmetrized 3D reconstruction for KdpFABC. The number of particles with the respective orientation is represented by length and color of the cylinders (long and red: high number of particles; short and blue: low number of particles). **E**

1067 Final reconstruction map of the E1-P tight state colored by local resolution as estimated by RELION. **F** FSC plot  
1068 used for resolution estimation and model validation of the E1-P tight state. The gold-standard FSC plot between  
1069 two separately refined half-maps is shown in red and indicates a final resolution of 3.3 Å. The FSC model  
1070 validation curves for FSCsum, FSCwork and FSCfree are described in the methods and show no overfitting. A  
1071 thumbnail of the mask used for FSC calculation overlaid on the map is shown in the upper right corner. Dashed  
1072 lines indicate the FSC thresholds used for FSC (0.143) and for FSCsum (0.5). **G** Anisotropy estimation plot of  
1073 the final E1-P tight map, showing no significant anisotropy. **H** Superposition of the E1-P tight structure obtained  
1074 in the presence of orthovanadate (colored) with the E1-P tight structure of KdpFAB<sub>S162-P</sub>C obtained under turnover  
1075 conditions (gray), showing that the adopted conformation is identical. **I** Fit of the BeF<sub>3</sub><sup>-</sup>-stabilized E2-P structure  
1076 [7BH2] (colored) into the E2-P map obtained in the presence of orthovanadate (gray), verifying the assignment  
1077 of the E2-P conformation.

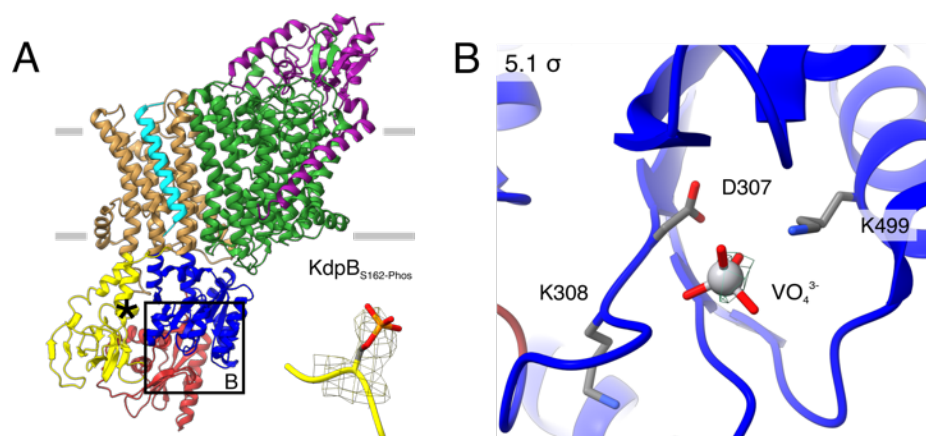

1078  
1079  
1080  
1081  
1082  
1083

**Figure 2 – Figure Supplement 5: E1-P tight structure of WT KdpFABS<sub>162-P-C</sub> in the presence of orthovanadate.** A The E1-P tight structure obtained from KdpFABS<sub>162-P-C</sub> in the presence of orthovanadate with the KdpB<sub>S162</sub> phosphorylation highlighted. C Nucleotide binding site in the P domain of the E1-P tight conformation, showing the coordinated orthovanadate (VO<sub>4</sub><sup>3-</sup>) that mimics phosphorylation of the catalytic KdpB<sub>D307</sub>. Densities are shown at the indicated  $\sigma$  level.

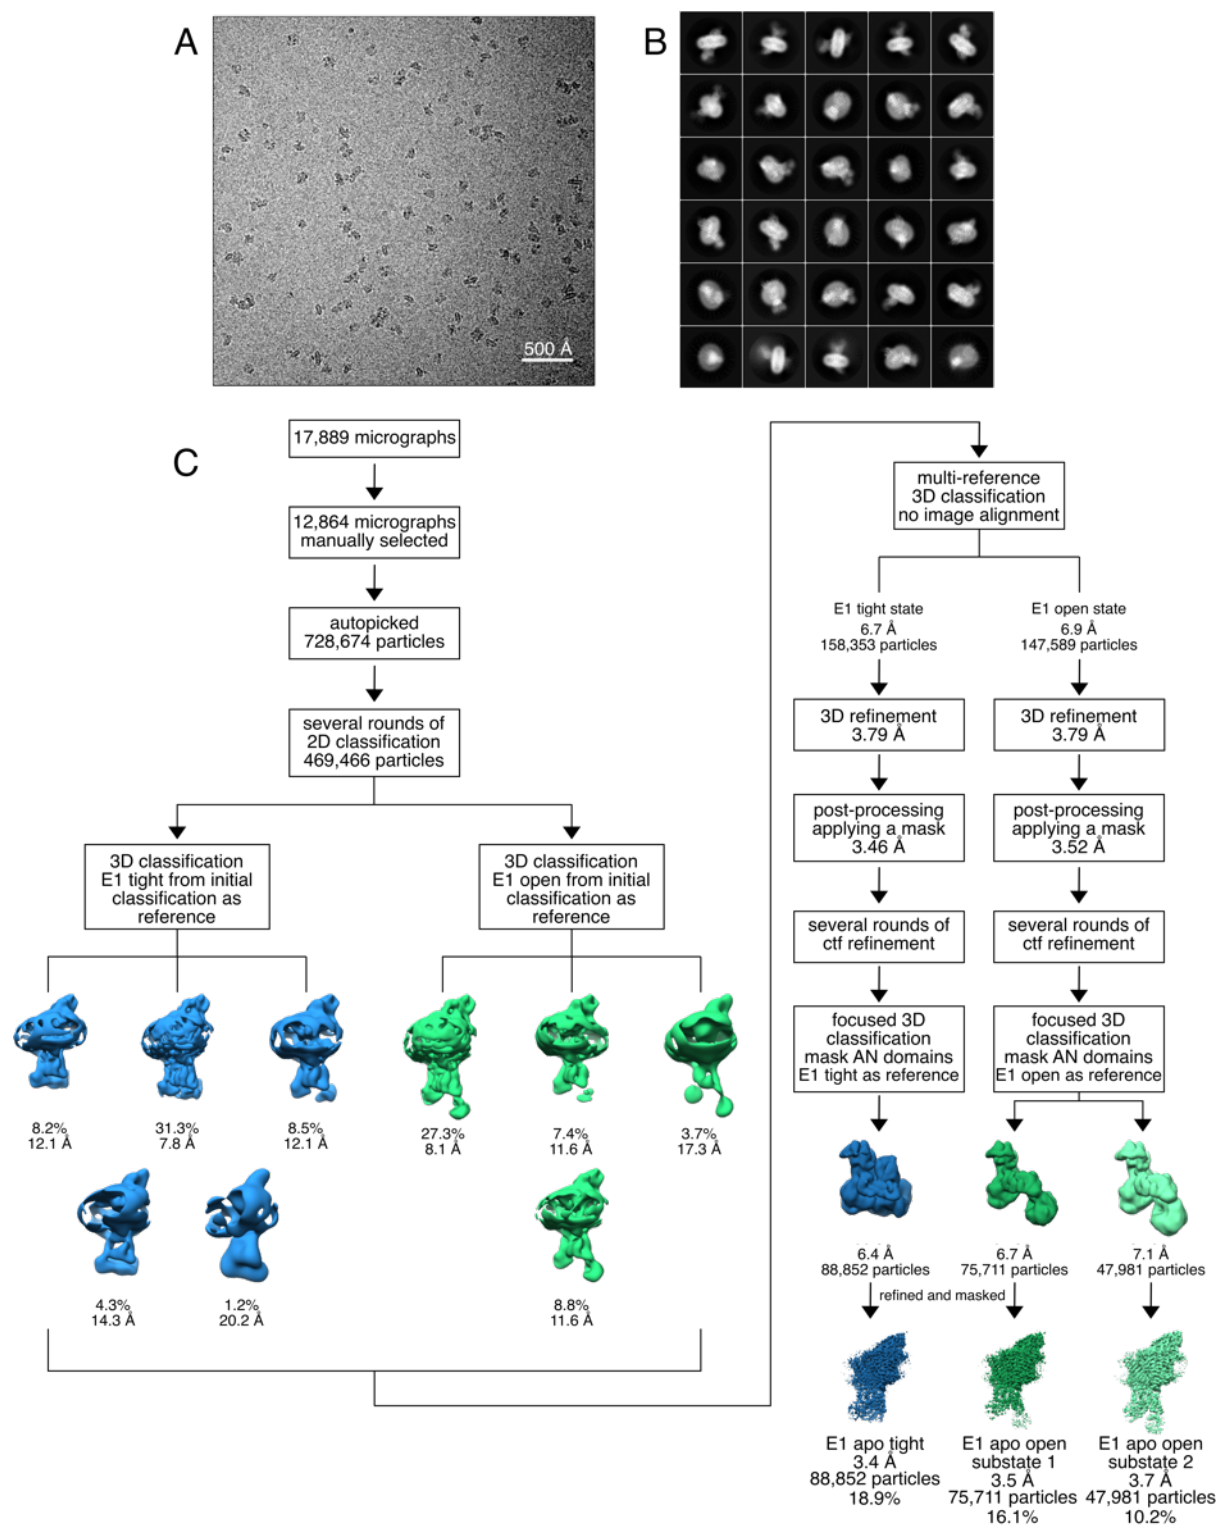

1084  
1085  
1086  
1087  
1088  
1089

**Figure 3 – Figure Supplement 1: Cryo-EM analysis of the KdpFAB<sub>S162-P/D307N</sub>C complex in the absence of nucleotide, resulting in the E1 apo tight and E1 apo open states.** **A** Representative cryo-EM image of the recorded data. **B** 2D class averages of vitrified KdpFAB<sub>S162-P/D307N</sub>C in the presence of 50 mM KCl. **C** Image processing workflow as described in the material and methods. Indicated class percentages refer to the initial set of particles defined after 2D classification.



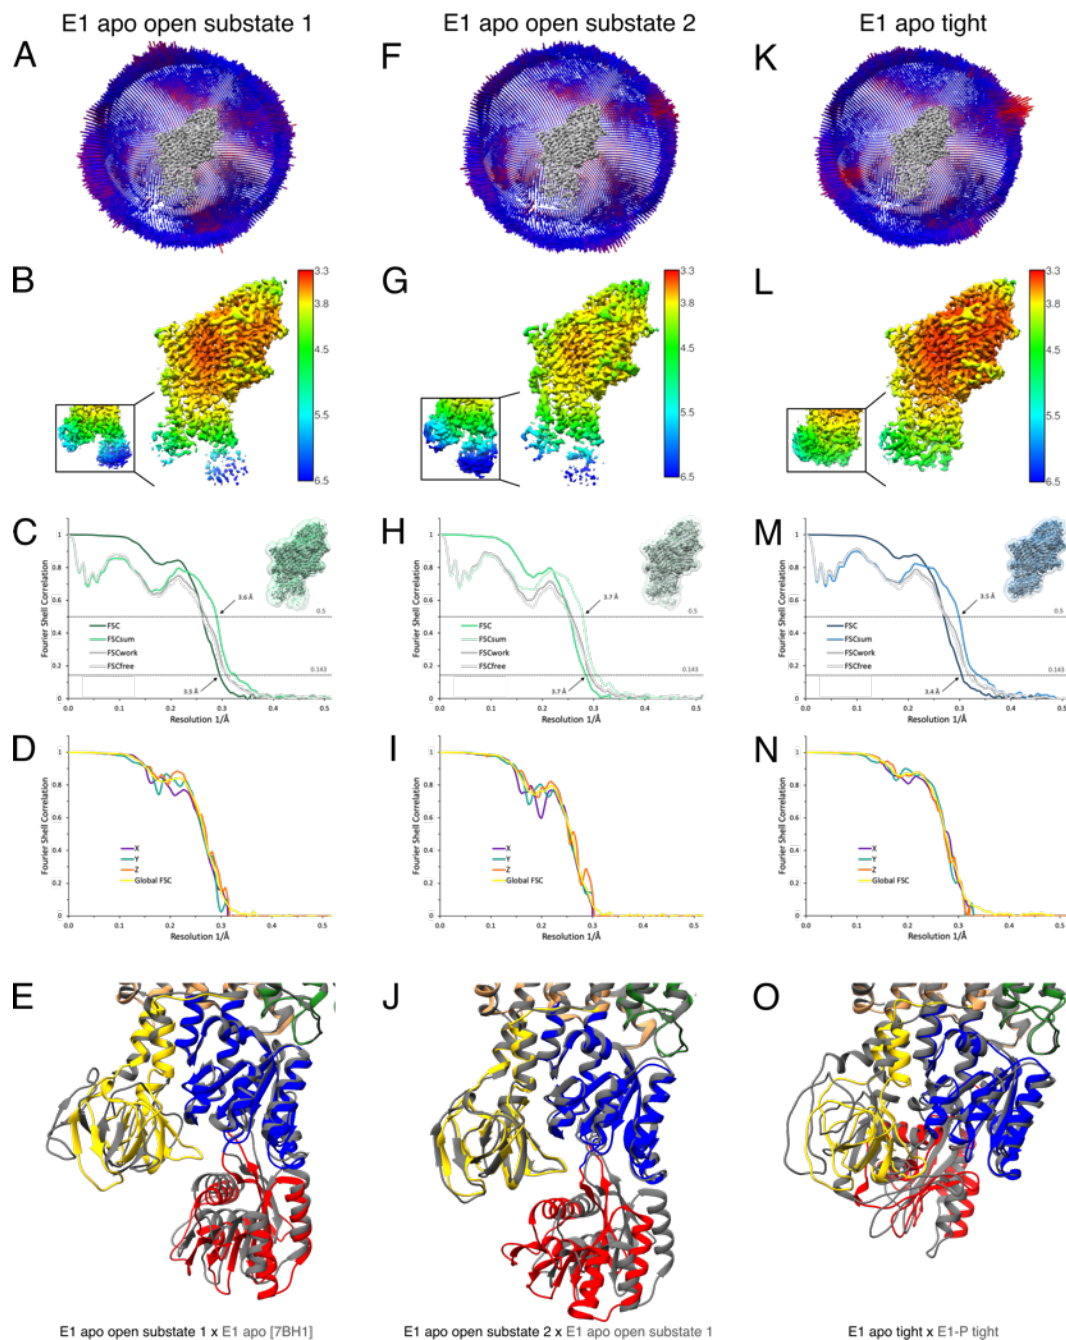

1090  
 1091 **Figure 3 – Figure Supplement 2: Cryo-EM validation of WT KdpFAB<sub>S162-P/D307N</sub>C under nucleotide-free**  
 1092 **conditions.** Validation shown for E1 apo open substate 1 (A-E), E1 apo open substate 2 (F-J) and the E1 apo  
 1093 tight state (K-O). **A,F,K** Angular distribution plot of particles included in the final unsymmetrized 3D  
 1094 reconstruction. The number of particles with the respective orientations is represented by length and color of the  
 1095 cylinders (long and red: high number of particles; short and blue: low number of particles). **B,G,L** Final  
 1096 reconstruction maps colored by local resolution as estimated by RELION. Inset shows N, P, and A domains at  
 1097 higher contour level. **C,H,M** FSC plots used for resolution estimation and model validation. The gold-standard  
 1098 FSC plot between two separately refined half-maps indicates final resolutions of 3.5 Å for the E1 apo open  
 1099 substate 1 (C), 3.7 Å for the E1 apo open substate 2 (H), and 3.4 Å for the E1 apo tight state (M). The FSC model  
 1100 validation curves for FSCsum, FSCwork and FSCfree are described in material and methods and show no  
 1101 overfitting. Thumbnails of the masks used for FSC calculation overlaid on the map are shown in the upper right  
 1102 corner of the curves. Dashed lines indicate the FSC thresholds used for FSC (0.143) and for FSCsum (0.5).  
 1103 **D,I,N** Anisotropy estimation plots of the final maps show no significant anisotropy. **E** Superposition of E1 apo  
 1104 open substate 1 (colored) with the E1 apo structure [7BH1] (gray), verifying the conformational assignment.  
 1105 **J** Superposition of the E1 apo open substate 2 (colored) with E1 apo open substate 1 (gray), showing a slightly  
 1106 different arrangement of the N domain. **O** Superposition of the E1 apo tight state with the E1-P tight state obtained  
 1107 under turnover conditions, showing a different arrangement of the cytosolic domains.

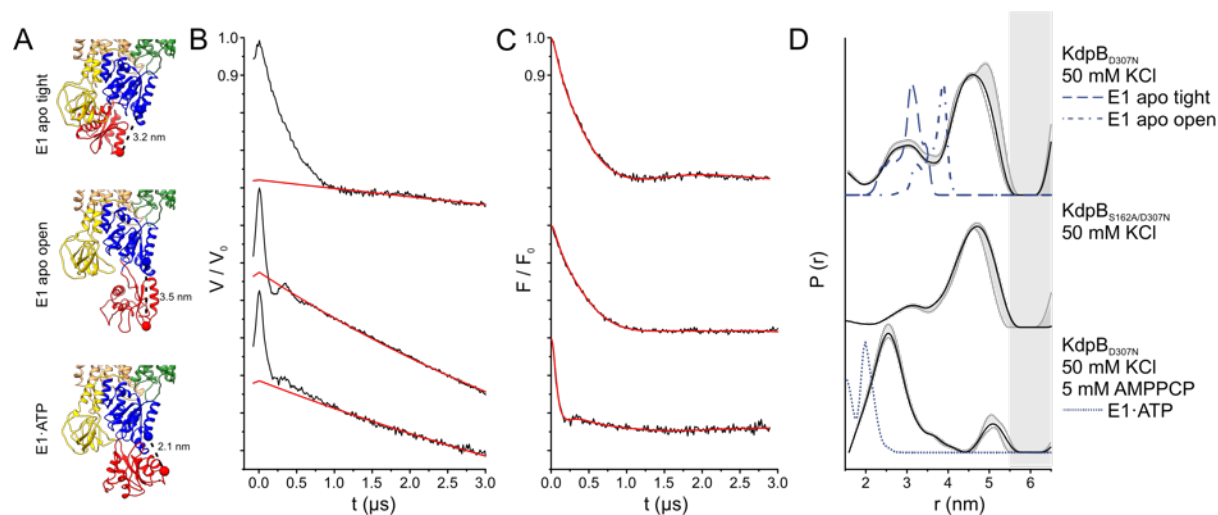

1108  
1109  
1110  
1111  
1112  
1113  
1114  
1115  
1116  
1117  
1118

**Figure 4 – Figure Supplement 1: Pulsed EPR measurements of KdpFABC variants in the absence and presence of AMPPCP. A** Cytoplasmic domains of the anticipated states with expected  $C_{\alpha}$ - $C_{\alpha}$  distances indicated. **B** Experimental raw data  $V(t)$  with fitted background function (red). **C** Background-corrected dipolar evolution function  $F(t)$  with applied fit (red). **D** Interspin distance distribution  $P(r)$  (black curves) obtained by Tikhonov regularization. Gray background curves indicate the full variation of possible distance distributions. The lower and upper error estimates (blue lines) represent the respective mean value minus and plus two times its standard deviation, respectively; the larger the deviations, the less reliable the predicted distances. Dashed gray lines represent the predicted distance distributions of the E1 apo tight, the E1 apo open and the E1-ATP states, respectively, using the MMM rotamer library analysis. Gray shaded areas starting at 5.5 nm indicate unreliable distances.

### Contact Sites: A domain (KdpB<sub>89-214</sub>) vs. N domain (KdpB<sub>314,450</sub>)

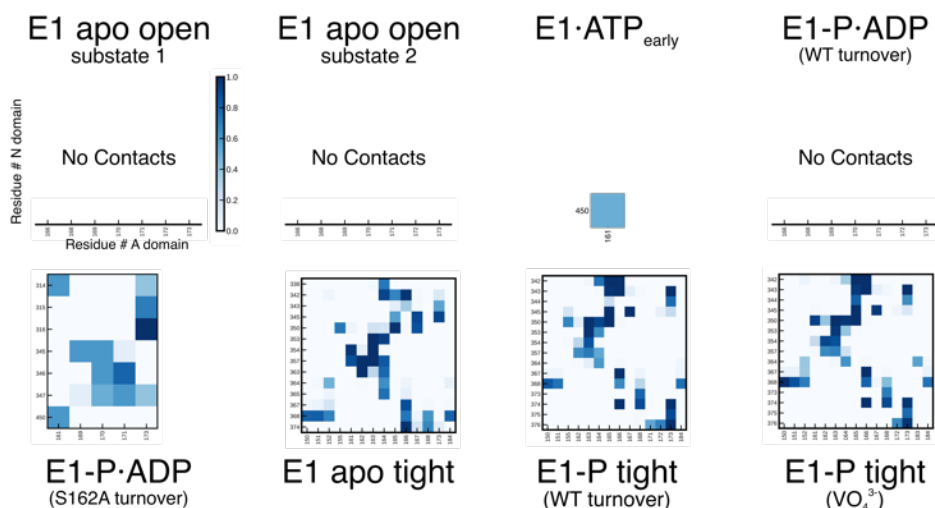

### Contact sites: A domain (KdpB<sub>89-214</sub>) vs. P domain (KdpB<sub>277-313,451-567</sub>)

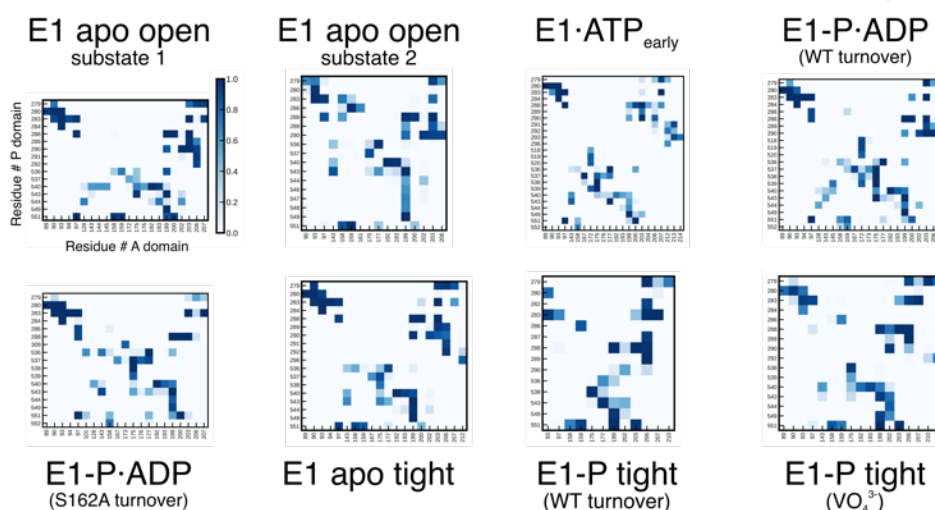

### Contact sites: P domain (KdpB<sub>277-313,451-567</sub>) vs. N domain (KdpB<sub>314-450</sub>)

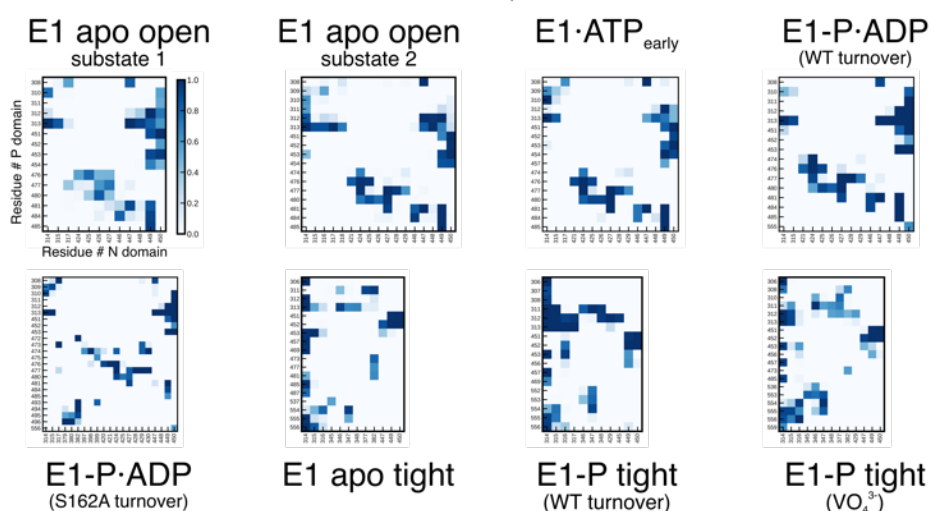

1119  
1120  
1121  
1122  
1123  
1124

**Figure 4 – Figure Supplement 2: KdpB<sub>S162-P</sub> mediates stabilization of the E1-P tight state.** A Contact site analysis of the KdpB N, P and A domains in the E1 conformations of KdpFABC. For each structure, graphs show contact sites observed over 3x50 ns MD simulations, where darker squares represent longer contact in the simulation time. Empty x-axes indicate no contacts.

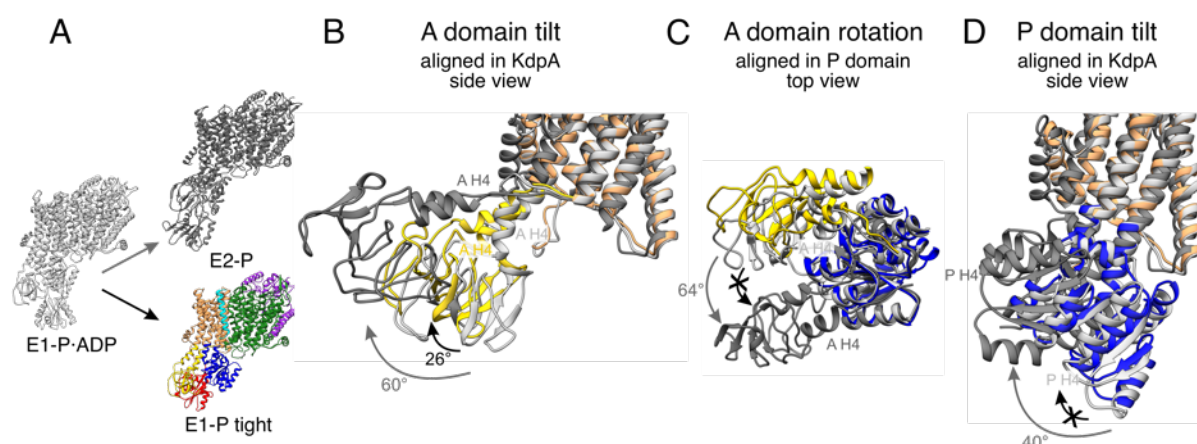

1125  
1126  
1127 **Figure 5 – Figure Supplement 1: Stalling of A and P domain movements of the E1-P/E2-P transition in the**  
1128 **E1-P tight state.** A Comparison of KdpFAB<sub>S162-P</sub>C in the E1-P tight state (colored) with KdpFAB<sub>S162-A</sub>C in the  
1129 E1-P·ADP (light gray) and E2-P (dark gray) states. Individual panels show (B) the tilt of the A domain (structures  
1130 aligned on the static KdpA, N and P domain removed for clarity), (C) the rotation of the A domain around the P  
1131 domain (structure of the cytosolic domains aligned on the P domain, N domain and the TMD removed for clarity),  
1132 and (D) the tilt of the P domain (structures aligned on the static KdpA, A and N domain removed for clarity).  
1133 During the E1-P/E2-P transition (gray arrows), the A domain tilts by 60°, while the P domain tilts by 40°.  
1134 Additionally, the A domain rotates by 64° around the P domain. The E1-P tight state shows a partial ‘attempted’  
1135 transition (black arrows), with a tilt of the A domain by 26°, although the P domain does not undergo global  
1136 rearrangements and the A domain does not complete its rotation around the P domain. Helices from the A and P  
domains used for angle measurements are labelled in all panels.

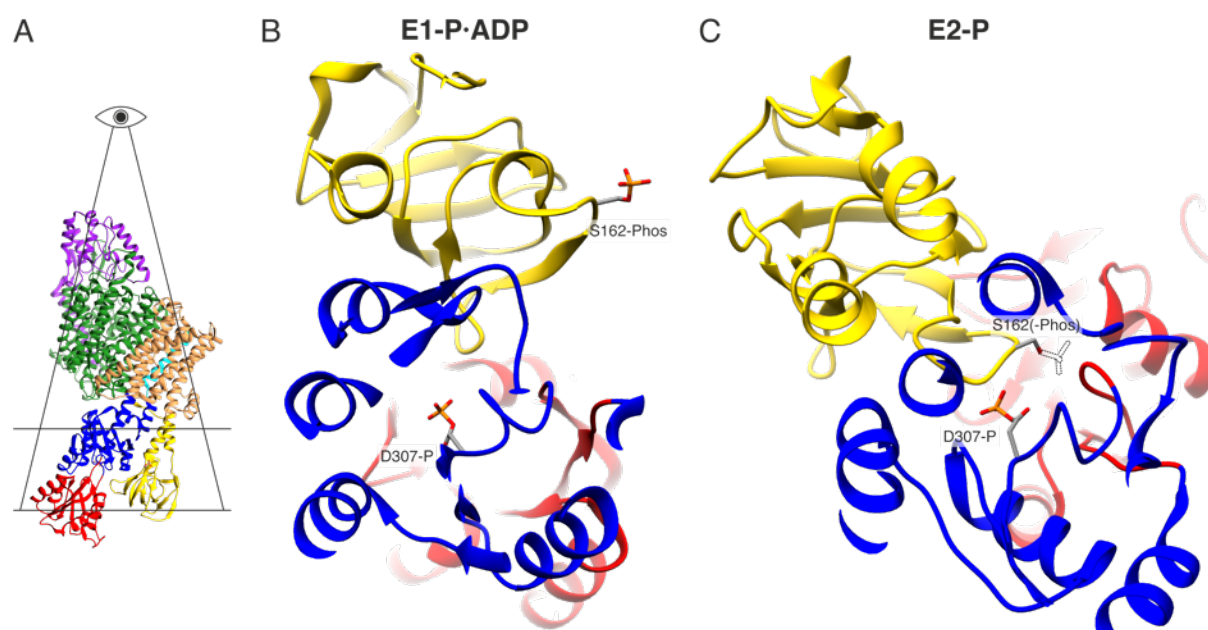

1137  
1138  
1139  
1140  
1141  
1142

**Figure 5 – Figure Supplement 2: Electrostatic repulsion of KdpB<sub>S162-P</sub> and KdpB<sub>D307-P</sub> during the E1-P/E2-P transition.** **A** Highlighted section displayed in **B**. **B** View of the proximity between KdpB<sub>D307-P</sub> and KdpB<sub>S162-P</sub> in the E1-P·ADP and hypothetical E2-P states. The transition to the E2-P state is not possible in the inhibited KdpFAB<sub>S162-P-C</sub>, since the catalytic phosphate would come in close proximity with the inhibitory KdpB<sub>S162-P</sub>, whose theoretical position in the E2-P state is shown as a dashed outline.
